# Supplementary material for: Mediterranean radiocarbon offsets and calendar dates for prehistory
Source: PubMed Central journal article supplement — Sci Adv. 2020 Mar 18;6(12):eaaz1096. doi: 10.1126/sciadv.aaz1096 (PMC7080444; doi:10.1126/sciadv.aaz1096), 2020-03-18
Supplement: aaz1096_SM.pdf [file aaz1096_SM.pdf]

## Supplementary Materials for

### Mediterranean radiocarbon offsets and calendar dates for prehistory

Sturt W. Manning\*, Bernd Kromer, Mauro Cremaschi, Michael W. Dee, Ronny Friedrich, Carol Griggs, Carla S. Hadden

\*Corresponding author. Email: sm456@cornell.edu

Published 18 March 2020, *Sci. Adv.* 6, eaaz1096 (2020)

DOI: 10.1126/sciadv.aaz1096

#### This PDF file includes:

Supplementary Materials and Methods

Fig. S1. Comparisons of some ETH AMS  $^{14}\text{C}$  data on known-age Mediterranean samples versus Hd data and IntCal98 and IntCal04/09.

Fig. S2. Comparison of Hd GeO LLGPC measurements (38) with OxA AMS  $^{14}\text{C}$  measurements on similar GeO (24).

Fig. S3. Comparison of the OxA AMS  $^{14}\text{C}$  measurements versus Hd LLGPC measurements on Anatolian juniper samples from a Middle Bronze Age dendrochronological time series built from *Juniperus* sp. samples from the archaeological sites of Kültepe, Acemhöyük, and Karahöyük (46).

Fig. S4. Comparison of Keck Carbon Cycle Accelerator Mass Spectrometry Laboratory, University of California, Irvine AMS  $^{14}\text{C}$  dates on known-age BCP (40) versus similar known-age GeO Hd LLGPC  $^{14}\text{C}$  data (38).

Fig. S5. Comparison of AMS  $^{14}\text{C}$  data versus Hd LLGPC  $^{14}\text{C}$  ages for similar Swedish pine.

Fig. S6. Cross-dating grid for the NOC *Quercus* sp. chronology.

Fig. S7. The indexed tree ring series comprising the NOC *Quercus* sp. chronology.

Fig. S8. The tree ring measurements of the NOC-12 and NOC-14 samples within the NOC chronology.

Table S1.  $^{14}\text{C}$  data used in this paper for Figs. 1 to 3 and figs. S1 and S5.

Table S2. The nine offset periods identified in Fig. 2A.

References (60–152)

## Supplementary Materials and Methods

### *Intra-annual offsets in $^{14}\text{C}$ measurements*

Observations of the seasonal (intra-annual) cycle of atmospheric  $^{14}\text{C}$  exist only for the past 60 years (22, 60–74), when bomb radiocarbon and fossil fuel ( $^{14}\text{C}$ -free) emissions dominate the seasonal cycle. However, time-varying stratospheric-tropospheric exchange, biospheric carbon fluxes, and cross-equator exchange is estimated to contribute  $\sim 3\%$  to the seasonal cycle of the northern hemisphere, with a minimum in March and a maximum in September. For example, the  $^{14}\text{C}$  values for *Picea abies* tree-rings from near the Schauinsland station (southern Germany) “closely match the summer values of the air samples averaged over the months May to August” (64), reflecting the later spring through summer growing season for this tree. The IntCal curve, through the IntCal13 iteration (4), primarily reflects this same later spring through summer record (thus peak intra-annual  $^{14}\text{C}$  levels (ref. 65 at p.1279)), given the typical tree growth period in central to northern Europe and in temperate to cooler northern North America. In contrast, radiocarbon dating of plant material with growth periods which reflect different parts of the annual  $^{14}\text{C}$  cycle can vary (i.e.  $^{14}\text{C}$  as  $^{14}\text{CO}_2$  is fixed into the plant matter via photosynthesis with this  $^{14}\text{C}$  record reflecting these different growth periods because of the intra-annual variations in  $^{14}\text{C}$  levels). Such differences in growing season may relate to spatial variation (different regions of the NH with different climate regions and hence growth periods) or altitude (where this affects growth period (66)). For example, the general dry-farming (versus limited instances of irrigation) growing season in the Mediterranean is October to May with harvest then variously in May through July (see below). This is almost the opposite intra-annual period versus the period of wood formation in the NH trees comprising IntCal. Underlying this there is also a small latitude effect for  $^{14}\text{C}$  ages in the mid-latitudes (5–9). We can refer to the available data from intra-annual sampling in the recent past (22, 60–64, 67–69), and approximately exclude the effects of modern fossil fuel contribution (22, 61, 62, 69), and atmosphere-biosphere exchange. This leaves the underlying (pre-modern, pre-industrial) seasonal *maximum* intra-annual variation for the mid-latitude NH due to recurrent changing stratosphere-troposphere exchanges in the extra-tropical and sub-polar region as potentially producing variation on the order of up to  $\leq 4\%$  ( $\sim 32$   $^{14}\text{C}$  years), and likely in a typical range of around 2 to 3% (so  $\sim 16$  to 24  $^{14}\text{C}$  years). This is the natural NH seasonal variability between early spring minima and late summer maxima. We use the approximate figure of  $\sim 3\%$  above. In support of such an approximate estimate, the intra-hemispheric location-dependent (regional) differences identified in ref. 14 were of a similar order ( $\sim 2.5\%$ ), as was the offset determined for pre-modern samples from Egypt (16, 23).

Work by a number of groups have reported data sets which indicate instances of likely differences (offsets) in contemporary (same year) terrestrial  $^{14}\text{C}$  measurements (14–18, 70–76). Some causal mechanisms are specific and regional: for example coastal upwelling influencing the local atmosphere (70, 71), or release of stored  $^{14}\text{CO}_2$  from permafrost (71–73). Otherwise, such variations are often associated either with the changing impact of a reservoir (e.g. ocean) on a region over time (75, 76), or with temporal differences in the timing of plant growing seasons and hence  $^{14}\text{CO}_2$  uptake, with effects perhaps maximized under certain conditions (15–18, 66, 77). Intra-annual data, and time-series of annual to decadal data, indicate that such offsets appear to vary over time (15, 18, 74, 77, 78).

An additional factor for consideration for this topic is the utilization of nonstructural carbon in deciduous trees when they begin their new spring growth. This incorporates previous year(s) stored carbon, and hence the initial early wood could, or should, reflect part of the previous year(s)  $^{14}\text{C}$  record (26). In a small-scale investigation, the contribution of stored carbon was estimated as between about one-third to less than one-half the seasonal effect, but is thus

nonetheless relevant (either minimizing the seasonal effect, or increasing it, depending on the rate of  $^{14}\text{C}$  production in a given inter-annual period) (26). While such issues likely are effectively irrelevant when  $^{14}\text{C}$  dating and calibration is based on multi-year blocks of wood (with annual variations largely cancelling each other out), this becomes of importance for single-year  $^{14}\text{C}$  calibration. Such findings suggest that employing whole annual rings of deciduous tree species, e.g. deciduous oak, is less than ideal to investigate the annual  $^{14}\text{C}$  record. Preference should therefore be given either to the use of tree-rings from non-deciduous tree species, or (for deciduous species) use of the late wood only, where no such re-use of stored carbon occurs. However, in this case, it must then be noted that this renders such a late-wood  $^{14}\text{C}$  record more strongly a NH summer record (as noted in the main text as regards the IrO latewood record in ref. 13), and so different from plant matter with winter-spring or spring to earlier summer growth periods.

### ***Typical traditional field crop growth periods in the Mediterranean***

The general dry-farming pre-modern traditional to ancient growing season for field crops (e.g. cereals) in the lower to medium elevation Mediterranean is broadly October to May (79, 80), with ancient authors (our earliest classical source is Hesiod (81)) placing the standard sowing period around the time of the setting of the Pleiades, and harvest when the Pleiades rises. (This is overlooking limited instances of irrigation in antiquity: ref. 82 pp.237–257.) Crops like barley, wheat, oats, peas, lentils, and vetch, are primarily sown in the autumn to winter and then harvested in the late spring to earlier summer. This is the major production cycle/period. Farmers of course had to adjust to the challenges of weather and circumstances, and there was for example some (but much less, and less productive) spring sown cereals (83–85). Any given standard timings varied also according to the local conditions, accounting for moisture availability, warmth, and elevation. Recent global warming has seen progressive small changes in sowing and harvest dates (86), and we may anticipate modest movement of average dates in the past according to major climate fluctuations. The typical traditional harvest dates (and so the *end* of the growth period) thus vary across the Mediterranean region according to latitude and elevation. Harvest therefore occurs earlier in lower elevation and especially southern areas, e.g. April–May in Jordan, Israel, or May–June in Cyprus and lowland Crete, whereas it is later in northern or higher areas, e.g. for lowland north Greece the harvest is typically from June to early July, and in the mountains of northwest Greece it occurs even later (85, 87, 88). In Italy, considering recent traditional practice and Roman evidence, the harvest period for wheat and other cereals is from late spring (warmer areas) and primarily June to July; earlier at lower elevation, and later at higher elevation. In north Africa and southern Spain, cereal harvest (winter wheat and barley) occurs in the warmer, lower areas from May through June, and is later further north and in higher areas (83, 89–91). The variations in harvest timings in the Mediterranean would suggest that  $^{14}\text{C}$  offsets from the IntCal record related to growing season are likely greatest in areas with earlier overall growing seasons and earlier harvests, i.e., the more southerly, lower elevation, and warmer areas. Some spring-sown Mediterranean crops and tree crops are harvested later (June–August) and offer some partial overlap with the IntCal tree-ring record. Grapes have a later growing period and harvest (end summer to autumn) more parallel with the IntCal tree-ring record. Olive fruits only start to form in later spring/early summer and are harvested much later, from later autumn through winter, moving this crop back at least partly out of kilter versus the IntCal tree-ring record (83, 85, 87–90).

### ***Radiocarbon dates and tree-ring samples employed in this study***

The Heidelberg (Hd)  $^{14}\text{C}$  data on tree-ring samples were obtained, processed and measured as described in previous publications (15, 24, 27, 38, 77, 92) employing the Heidelberg low level gas proportional counting (LLGPC) facility. We observe that in the middle of the period (2007) that

the GeO samples reported in ref. 38 were measured that the Hd laboratory participated in the SIRI inter-laboratory inter-comparison exercise (93). The eight samples measured (VIRI Samples R, L, M, S, O, U, K, P), exhibited an average  $\sim 0.15$  offset in  $\Delta^{14}\text{C}\%$  values versus the consensus values from the exercise (Hd minus consensus  $\Delta^{14}\text{C}\%$  values of respectively: 0.73, -0.75, 1.77, 2.24, -2.31, -1.35, 0.28, 0.58), again suggesting no substantive offset (see main text discussion). The German Oak (GeO) samples come from the Hohenheim GeO tree-ring chronology (94). The Irish Oak (IrO) samples come from the Belfast tree-ring chronology (95) (raw tree-ring series data available from: [http://www.chrono.qub.ac.uk/bennett/dendro\\_data/dendro.html](http://www.chrono.qub.ac.uk/bennett/dendro_data/dendro.html)). These European oak samples, comprising whole annual growth increments, should largely reflect the main standard growing season for European oaks from spring (late April/start May but in some areas including Ireland starting a little earlier) through the entire summer to sometime from late August to mid-September as observed for mature trees through observation and experience (96), and via experimental observations on seedlings (97). The Gordion *Juniperus* sp. samples (GOR) come from the Gordion tree-ring chronology (15, 27, 77, 98). The data employed in this paper are listed in table S1. A study of modern junipers in the central Anatolian region (not far from Gordion) found the main positive growth association with late Autumn to start of winter (December) and later spring (May-June) precipitation and later winter (February) temperature (99). In reverse, growth was affected by, and then restricted/ended by, drier and hotter conditions in later spring (May-June onwards) and then especially by summer heat and dry conditions (99). Twelve additional Mannheim (MAMS) data on Turkish Pine (TuP) are also included, with these samples processed and run as described for this facility (44) with its MICADAS (IonPlus®) accelerator mass spectrometer (AMS) (100).

The Groningen (GrM) data on *Quercus* sp. samples from Noceto, Italy (table S1), followed the standard acid-base-acid (ABA) framework and subsequent refinements (101). The first acid (HCl, 4% w/vol, 80°C) step is employed to eliminate any geological carbonates that may have penetrated into the materials. The samples are then rinsed to neutrality with ultra-pure water. The second step involves the application of an alkaline solution (NaOH, 1% w/vol, RT) which dissolves any supramolecular polyphenols (mainly humic acids) that may have been absorbed from the soil. After another rinse to neutrality, a second acid step is employed (HCl, 4% w/vol, 80°C) to ensure no atmospheric CO<sub>2</sub> absorbed during the alkaline phase remains in the reaction vessel. The samples are then rinsed to neutrality once more. For the wood samples, an additional aqueous oxidation step is also applied (NaClO<sub>2</sub>/H<sup>+</sup>, 2.5% w/vol, 80°C) to isolate the holocellulose fraction. This step is also followed by a final rinse to neutrality. The pretreated materials are then thoroughly dried. Approximately 3.5 mg aliquots of the charred seed and charcoal products, known as the reduced carbon fraction, and 5 mg of the holocellulose extracts, are then weighed into individual tin capsules for combustion in an Elemental Analyser (EA, IsotopeCube NCS, Elementar®). The EA is coupled to an Isotope Ratio Mass Spectrometer (IRMS, Isoprime® 100), which allows the  $\delta^{13}\text{C}$  value of the sample to be measured, and a fully automated cryogenic system that traps the CO<sub>2</sub> liberated on combustion. When the run is complete, the individual reaction vessels are transferred to a graphitisation manifold, where a stoichiometric excess of H<sub>2</sub> gas (1: 2.5) is added, and the CO<sub>2</sub> gas is reduced to graphite over an Fe(s) catalyst. The graphite samples are then pressed into zinc cathodes, and their radiocarbon ratios measured by a MICADAS (IonPlus®) AMS (100). The quality of radiocarbon dates at Groningen CIO is assured through the monitoring of subsidiary data relative to acceptance criteria, International Atomic Energy Agency (IAEA) reference and known-age sample measurement, and regular repetition of pretreatments on the same sample. Subsidiary parameters include but are not limited to: sample pretreatment yields, %C on combustion,  $\delta^{13}\text{C}$  and  $\delta^{15}\text{N}$  values, and C:N ratios (bone collagen). Known-age standards of each of the main material types are taken through chemical pretreatment. The standards currently utilised include but are not

limited to: the horse bone from the VIRI interlaboratory comparison; the Owen Buddleia modern charcoal standard (Oxford Radiocarbon Accelerator Unit); background wood from Kitzbuhel, Austria; and assorted dendrochronological tree-rings from the Dutch Cultural Heritage Agency.

The University of Georgia (UGAMS) dates measured at the Center for Applied Isotope Studies (CAIS) at the University of Georgia on the OYM samples were processed using the following protocols and standard laboratory procedures (102). The samples were pre-treated using the acid/alkali/acid (AAA) method followed by bleaching. Samples were placed in 1N HCl and heated to 80°C for 1 hour to remove secondary carbonates and acid-soluble compounds; washed with 0.1 M NaOH to remove possible contamination by humic acids; and treated with dilute HCl a second time to remove atmospheric CO<sub>2</sub>. The samples were bleached (5% wt/vol NaClO<sub>2</sub>, pH=3) for 1 hour at 80°C followed by 24 hours at room temperature, and rinsed 3x in ultra-pure (Milli-Q) water. The samples were dried and prepared for stable isotope and radiocarbon analysis as described below. Since the samples had not achieved a pure white color, the excess sample underwent the bleaching routine a second time (total bleach time ≥ 48 hours) and now exhibited a pure white color. This white sample material was employed for the dates reported here. Following each acid or alkali treatment the samples were washed in deionized water, centrifuged, and decanted. Samples were dried at 60°C. For AMS analysis, the cleaned samples were combusted at 900°C in evacuated / sealed quartz ampoules in the presence of CuO. The resulting carbon dioxide was cryogenically purified from the other reaction products and catalytically converted to graphite (103). Graphite <sup>14</sup>C/<sup>13</sup>C ratios were measured using the CAIS 0.5 MeV accelerator mass spectrometer and normalized using the Oxalic Acid I standard (NBS SRM 4990). To correct for isotopic fractionation, the sample <sup>13</sup>C/<sup>12</sup>C ratios were measured separately using isotope ratio mass spectrometry (IRMS) and expressed as δ<sup>13</sup>C with respect to PDB, with an error of less than 0.1‰. The quoted uncalibrated dates have been given in radiocarbon years B.P. (before AD 1950), calculated using the Libby half-life of 5568 years. The error is quoted as one standard deviation and reflects both statistical and experimental errors. The quality of radiocarbon dates is assured through the monitoring of known-age standards, including Oxalic Acid I (NBS SRM 4990) and wood from the FIRI interlaboratory comparison (FIRI D,F), as well as anthracite background.

The date on an OYM sample from the Tübitak National 1 MV AMS Laboratory was pretreated and dated according to their standard procedures, comprising a modified acid-alkali-acid method, graphitisation, and then measurement by AMS with a 1MV NEC Pelletron accelerator (104).

The Noceto oak (*Quercus* sp.) samples employed in this study, NOC-12, NOC-14, are secure parts of a larger tree-ring chronology from the wooden materials recovered at the site (105) built following standard dendrochronological methods (106) using the Tellervo and Corina software and procedures (107, 108) (figs. S6-S8). NOC-12 covers relative years 1035-1188 of this chronology, and NOC-14 covers relative years 980-1206 of this chronology. NOC-12 appears to be from the same original source tree as samples NOC-6, NOC-8, NOC-15, NOC-16 and NOC-20, and NOC-14 appears to be from the same original source tree as samples NOC-19 and NOC-21 (fig. S8). As individual samples (NOC-12 v. NOC-14) or as groups (NOC-6, 8, 12, 15, 16, 20 v. NOC-14, 19, 21) there is a secure crossdate (figs. S6, S8). Specific tree-ring samples for <sup>14</sup>C dating were dissected with a steel blade under a binocular microscope; the resultant <sup>14</sup>C data by tree-rings are listed in table S1.

The OYM-50 sample from Oymaağaç Höyük (or Nerik) (109) comprised a cross-section of *Pinus brutia* (or *halepensis* – differentiation is not possible solely from wood anatomical analysis but the site location favors a likely identification as *Pinus brutia*), with in total 77 tree-rings from pith

to last preserved tree-ring (which was likely the ring below bark since it was preserved around the extant circumference – of which just a small part was missing). The  $^{14}\text{C}$  dates on this sample are listed in table S1.

The AA BCP (whole annual growth increment) and latewood (only) IrO data were employed as published (13). We use the data as presented in ref. 13 table S1. This lists the known calendar dates for the BCP samples as 3649 cal B.P. (1700 BCE) to 3450 cal B.P. (1501 BCE), a 200-year inclusive series, and the known age IrO as from 3615 cal B.P. (1666 BCE) to 3529 cal B.P. (1580 BCE), an 87-year inclusive series. We can compare the single-year AA BCP data as weighted averages for the same years (or all available years where there is incomplete AA BCP coverage due to missing 3454 and 3456 cal B.P. rings) to those years represented by the multi-year Hd GeO segments (table S1) (weighted average where two or more data are from the identical years). This shows a weighted average offset of AA BCP to Hd GeO of  $26.5 \pm 2.3$   $^{14}\text{C}$  years ( $n=50$  comparisons). For the period centered 1596 cal B.P. (1647 BCE) to 3491 cal B.P. (1542 BCE) the offset is larger:  $36.4 \pm 2.9$   $^{14}\text{C}$  years ( $n=34$  comparisons). This offset must reflect either differences in the  $^{14}\text{C}$  ages of the samples, or differences between the two laboratories, or a combination of these factors. The difference over only 24 available comparisons 3614.5 cal B.P. (1665.5 BCE) to 3529.5 cal B.P. (1580.5 BCE) for AA IrO to the Hd GeO (as above) is  $27.3 \pm 3.9$   $^{14}\text{C}$  years B.P. The AA BCP to Hd GeO offset for this same 3614.5 to 3529.5 cal B.P. interval is  $33.2 \pm 3.3$   $^{14}\text{C}$  years B.P. (thus a  $\sim 6$   $^{14}\text{C}$  year difference matching the internal AA BCP to AA IrO difference of  $6.4 \pm 2.0$   $^{14}\text{C}$  years). The difference between the (same laboratory) AA BCP to AA IrO datasets of, on average,  $6.4 \pm 2.0$   $^{14}\text{C}$  years suggests that there is a small sample-related difference between BCP and IrO (related to differences in latitude, growing season, elevation, or a combination of these factors). The implication of the above comparisons is that most of the remaining difference between the AA BCP and AA IrO data versus the Hd GeO data, around 20  $^{14}\text{C}$  years of difference overall, and up to  $\sim 30$   $^{14}\text{C}$  years at some periods, is likely a difference between the two laboratories (methods, instruments). Some of this could be a putative LLGPC to AMS  $^{14}\text{C}$  offset (see main text, up to perhaps  $\leq 10$   $^{14}\text{C}$  years?). The remainder then is likely an inter-laboratory difference (unless a larger AMS  $^{14}\text{C}$  to LLGPC offset is established with further work). There appears to be an unexplained discrepancy in ref. 13 in its Fig. 1 and caption. The IrO are there stated in the caption to Fig.1 to be “Irish oak data (1661–1576 BCE; green)”, this would mean an 85-year inclusive series and placed 5 and 4 years later than the known-ages stated in table S1. Examination of the plot in ref. 13 Fig. 1 (both parts A and B) shows the green symbols (in ref. 13 Fig. 1A) or line and shading (ref. 13 Fig. 1B) for the IrO placed at about 1666-1576 BCE (a 91-year sequence). Thus the plot combines the ref. 13 table S1 date for the start of the series and uses the alternative 1576 BCE end date in the ref. 13 Fig. 1 caption (versus 1580 BCE in ref. 13 table S1). The IrO have somehow acquired extra years. We employ the IrO data and calendar ages as reported in ref. 13 table S1, assuming these are likely the accurate values. We therefore have to express concern over the IrO data as plotted in ref. 13 Fig. 1.

We regard the AA BCP dataset (13) as offering a likely maximum adjustment case to the IntCal record in the analysis shown in Fig. 6. The reasons are as follows.

(i) The next iteration of IntCal (IntCal20) will also include nearly all the existing data available in IntCal13 (4), in addition to the considerable body of new data now available. Thus, despite the numerical weighting by volume from the new AA data (and other new data), this will nonetheless create some lowering of any overall set mean/best fit.

(ii) The AA IrO data (13) are slightly more recent on average (by  $6.4 \pm 2.0$   $^{14}\text{C}$  years) than the AA BCP data. This indicates again that including all other data will likely only lower (even if just slightly) the final IntCal value versus the reported AA BCP record. Hence, we consider the AA BCP record as an indication of a maximum change scenario.

We note that use of the ref. 13 AA BCP dataset makes no substantive change to the GOR wiggle-match placement. For example, modifying the IntCal04 dataset 3649 to 3450 cal B.P. with the BCP dataset (13) leads to the same best fit (3686 cal B.P.) for the GOR series as reported in the main text and Fig. 1B.

The Gordion (GOR) *Juniperus* sp. data set has been published previously (15, 27, 77, 98, 110, 111). A relevant question is whether the  $^{14}\text{C}$  offsets we identify in this paper potentially affect the accuracy of the wiggle-match date placement of the time-series, and hence add a substantive complication when undertaking comparisons. Commonsense would suggest that, were we dealing with the case of a short time-series, then the effect of an offset on part or all of this series could indeed change its placement. However, in contrast, when dealing with a long many-century time-series, then you would anticipate that it is the overall pattern that will determine the placement and the effect of a few periods of modest offsets (in either direction) would be minimal on the overall placement (likely cancelling each other out). To explore and quantify, we can consider an experiment. First, we can take the GOR record and simply remove the data from the positively offset periods identified in Fig. 2 and table S2 and then consider the wiggle-match placement found from the remaining non-, or negatively-, offset data. We consider this reduced set (52 dated elements and 56  $^{14}\text{C}$  dates) against IntCal04 as in the main text and the best fit is placed just -3 years  $\pm 2$ , with e.g. GOR ring 816.5 placed  $3646 \pm 1$  cal B.P. ( $1697 \pm 1$  BCE) with the full dataset and  $3643 \pm 2$  cal B.P. ( $1694 \pm 2$  BCE) with the reduced dataset excluding the offset periods. Second, we can then consider the reverse, and a wiggle-match just with the positively offset data periods identified in Fig. 2 and table S2 (65 dated elements and 72  $^{14}\text{C}$  dates). Here the wiggle-match best fit against IntCal04 is just +4 years  $\pm 2$  with e.g. GOR ring 776.5 placed  $3686 \pm 1$  cal B.P. ( $1737 \pm 1$  BCE) with the full dataset and  $3690 \pm 2$  cal B.P. ( $1741 \pm 2$  BCE) with the reduced dataset only including the offset periods. The conclusion, taking the extreme cases, using data from either just positively offset periods, or non-positively (i.e. no offset or negatively offset) periods, is a very small overall range of possible movement in the date placement for the GOR wiggle-match (a total of  $\sim 7$  years  $\pm 2.8$ ) centered around the date placement employed in the main text. We therefore use the placement from the complete dataset (with both positive and non-positive offset periods, which are relatively balanced) and regard the combined placement as likely accurate within very small margins.

### ***OxCal Models, Coding and Weighted Averages***

The OxCal software was employed for  $^{14}\text{C}$  calibration (59, 112) and wiggle-matching analysis (39). Version 4.3.2 was employed, except for the Fig. 4A analysis which employed version 4.1.7 as did the re-runs of the ref. 23 model mentioned in the main text. Curve resolution of 1 year was employed. For the wiggle-matches the SSimple outlier model was applied to individual data (113). Where more than one  $^{14}\text{C}$  date was available on identical material we considered a weighted average value (114). Within uses of OxCal we employed the R\_Combine function to calculate such weighted averages; otherwise we calculated them following ref. 114 (denoted as wAV). For outlier assessment of the data in an R\_Combine and the R\_Combine product we used the SSimple Outlier model for the individual data and the SSimple Outlier model (113) for the R\_Combine itself (following the coding examples in ref. 115).

### ***Climate Change, History and Archaeology at the end of the Late Bronze Age***

The end of the Late Bronze Age and the period from then through the earlier Iron Age (12<sup>th</sup>–10<sup>th</sup> centuries BCE) is a period of major social, political and economic transformation in the Mediterranean (53, 116–118, ref. 119 pp.445-523, ref. 120 pp.129-181, 121). A number of the long-established major empires and states of the region during the mid to later Late Bronze Age

(~1500–1200 BCE) either collapse, or transform, in substantive ways. The second millennium BCE trade systems and political structures experience major systemic changes or reorientations. The earlier Iron Age sees the emergence of changed or new, mainly smaller, political entities. Among other considerations in discussions of causes and associations, climate changes or perturbations have been linked with this period of transformation (52, 53, 118, 122–126).

### ***The Santorini/Thera olive branch***

The main text discusses the calendar dating of the last (outermost)  $^{14}\text{C}$ -dated section of the published Santorini olive branch sample (13, 54, 56, 58, 127, 128). A separate question is whether this date reflects the approximate time of the Thera/Santorini volcanic eruption (on the topic of the date of the eruption, see below). Although the date for the outermost dated segment of the olive branch corresponds well with  $^{14}\text{C}$  dates on short-lived (annual) samples from the volcanic destruction level on Thera/Santorini (54–56, 129), there has been some debate around this sample and its dating (130–132, ref. 133 at pp. 74–79, 175–181, 197–198). Dating of modern olive wood sections illustrates that wood from different locations around the outer circumference of olive tree branches or stems can exhibit varying ages; some were more or less contemporary with the appropriate age range, but other portions yielded ages as much as ~40–50 years older (132). We observe, however, that those portions of the olive sections in ref. 132 that visibly are associated with the latest growth regions, or lobes, of the branch/tree stem sections yield the more recent ages. This statement is based on examination of ref. 132 Figs. 2, 3 (in 8 of 9 cases for the tree section and 5 of 5 cases for the branch section). Furthermore, these ages are fairly close to the correct ages: of 2013 CE for the branch (minus the tree growth material between the bark and sampled wood for the  $^{14}\text{C}$  date), and the unknown date a few years before 2013 CE for the tree section (Zippori tree, which had been “dead for only a few years before felling in 2013”). Examination of the illustrations of the Santorini olive branch section and the portions sampled for the  $^{14}\text{C}$  dates indicates that this represents an ordered sequence of dates out to a growth lobe (ref. 58 Fig. 1, ref. 129 Fig. 5, ref. 134 frontispiece). We note that we accept that ring-counting is not typically possible for olive wood (130, 131). Nonetheless, the dating of wood segments from a section of olive wood (stem or branch) progressively from inner to outer segments along a radius offers an ordered time-series (older to more recent) (54, 56, 128, 133). Hence there is a reasonable expectation that the date of the outer portion of a growth lobe likely reflects a period not long before the approximate time this branch ceased growing. The hypothesis is that the volcanic eruption killed and buried the branch and parent tree, and the context of the branch find suggests that the tree was alive up until the time of the volcanic eruption which buried it (58, 127–129). In turn, the good correspondence of the  $^{14}\text{C}$  dates, both on short-lived (annual) plant matter from the volcanic destruction level on Santorini/Thera, and on the olive branch (54–56, 129), combined with the find context of the olive branch, with remains of leaves and roots *in situ* (127–129), are all consistent with this hypothesis. (And not with suggestions that the branch had been dead for several to many decades before the eruption.)

### ***Dates for the Santorini/Thera eruption***

The date estimated for the mid second millennium BCE ‘Minoan’ Santorini/Thera eruption event in 20<sup>th</sup> century scholarship up to the 1970s was usually ~1500 BCE (54–58, 135–138). This date was derived from interpretations of material and stylistic linkages as recognized archaeologically between the cultures of the Aegean and the east Mediterranean (and especially Egypt, where an approximate historical chronology exists for the mid-later second millennium BCE). If an alternative date was suggested, it was usually to consider a date between 1500 and 1450 BCE. This ~1500 BCE date is the traditional ‘low’ chronology date (57, 135). In contrast, based on radiocarbon dating in particular, as well as discussions considering various possible indications (via ice-cores, tree-rings, speleothems), along with critique and re-assessment of the



archaeological evidence and its interpretation, other scholarship from the 1980s to present has advocated a higher chronology (54-56, 58, 111, 127-129, 133, 134, 136-140). This 'high' date places the eruption in the later 17<sup>th</sup> century BCE, or perhaps in the early 16<sup>th</sup> century BCE. Not surprisingly, deliberately or unconsciously, there has been something of a push for a compromise (56, 138, ref. 141 pp.5-8, 142). Some 'low' chronology scholarship has suggested dates as early as about 1530/1525 BCE (143, 144), and some 'high' chronology scholarship has considered how to close the gap (56, ref. 138 pp.12-45, 49-67, 321-340). This might indicate a date around or a little after 1600 BCE (including, for example, possible tree-ring width minima potentially associated with major volcanism 1619-1617 BCE and 1597 BCE (145)). The <sup>14</sup>C dataset of ref. 13 pushes the field to think in the same direction of a possible compromise, perhaps ~1597 BCE or ~1560 BCE (13)—maybe with the eruption associated with the unusual storm events of the Ahmose Stela (146)—as does a recent re-assessment of the ice-core and other proxy evidence potentially related with the Santorini eruption (147). A date for the Santorini eruption in the early-mid 16<sup>th</sup> century BCE—thus a little before, or around the start of, the Egyptian New Kingdom, or 18<sup>th</sup> Dynasty (23, 49, 133, 138)—would, nonetheless, require much of the re-thinking of the traditional (low) archaeological synthesis proposed by the 'high' chronology critique (55-56, 58, 133-142). In particular, it is important to appreciate that the majority of the long Late Minoan IA period, a high-point of Minoan civilization (the second part of a combined, so-called New Palace, Middle Minoan III-Late Minoan IA acme era), was *before* the Santorini eruption (on the secure basis of stratigraphy). The same applies to the initial Late Bronze Age elsewhere in the Aegean (e.g. Late Helladic I, Late Cycladic I), and contemporary cultural horizons in the east Mediterranean such as the earlier Late Cypriot I period (54-57, 133-143). Thus, as with the 'high' chronology, a date for the Santorini eruption around, or a little before, the start of the Egyptian New Kingdom (the 18<sup>th</sup> Dynasty) places this initial Late Bronze Age cultural horizon contemporary with, and in the context of, the previous and different Hyksos-Levantine world of the east Mediterranean ~1700-1550 BCE. That is before the Egyptian New Kingdom. This is a structural and historically important difference (138, 148). However, at the same time, such a compromise early date for the Santorini eruption, somewhere from ~1600 BCE to during the earlier 16<sup>th</sup> century BCE, would also be much easier to accommodate versus the long-standing general syntheses of the archaeology and history of the eastern Mediterranean. The quote "compromise early chronology", cited in the main text, comes from ref. 138 p.49. As illustrated in Figs. 5 and 6, clarification will come from better definition of the appropriate Mediterranean-relevant <sup>14</sup>C record.

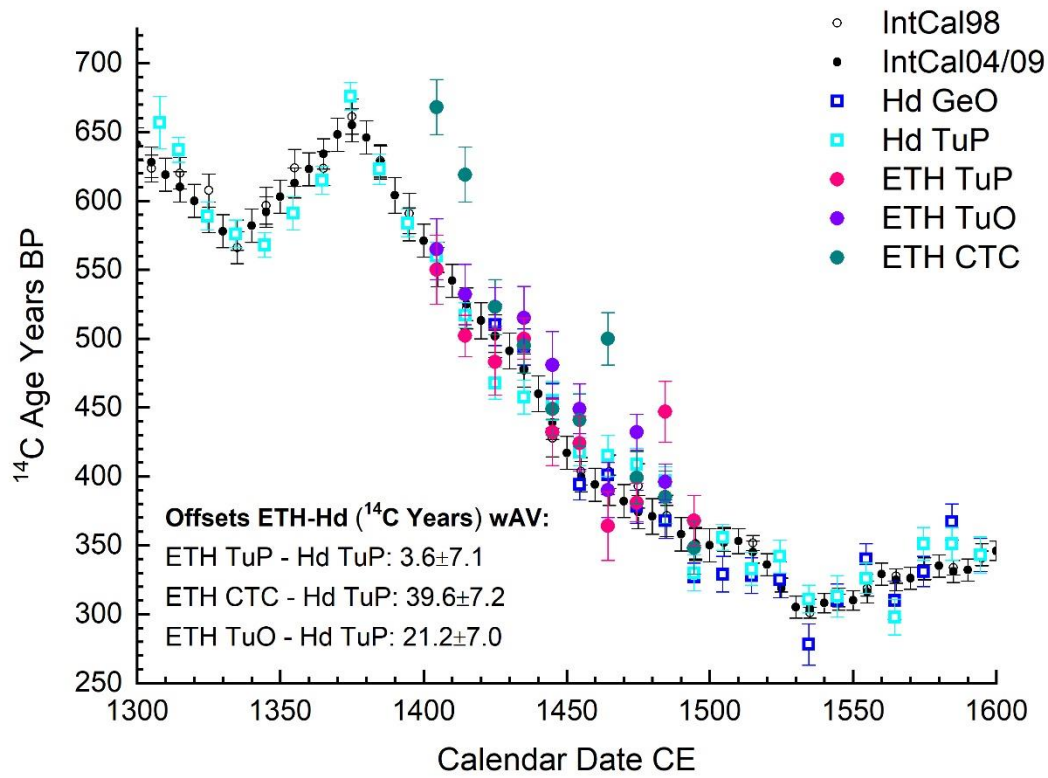

**Fig. S1. Comparisons of some ETH AMS <sup>14</sup>C data on known-age Mediterranean samples versus Hd data and IntCal98 and IntCal04/09.** ETH AMS <sup>14</sup>C measurements on known-age Turkish Pine (TuP) from Çatacık, Turkish Oak (TuO) from Bekdemir (149), and *Pinus nigra* from the Troodos Mountains in Cyprus (CTC) (150) (table S1) versus Hd LLGPC data on similar Turkish Pine (TuP) from Çatacık, Hd data on German Oak (GeO), and versus the IntCal98 and IntCal04/09 calibration datasets (Fig. 1A) (table S1).

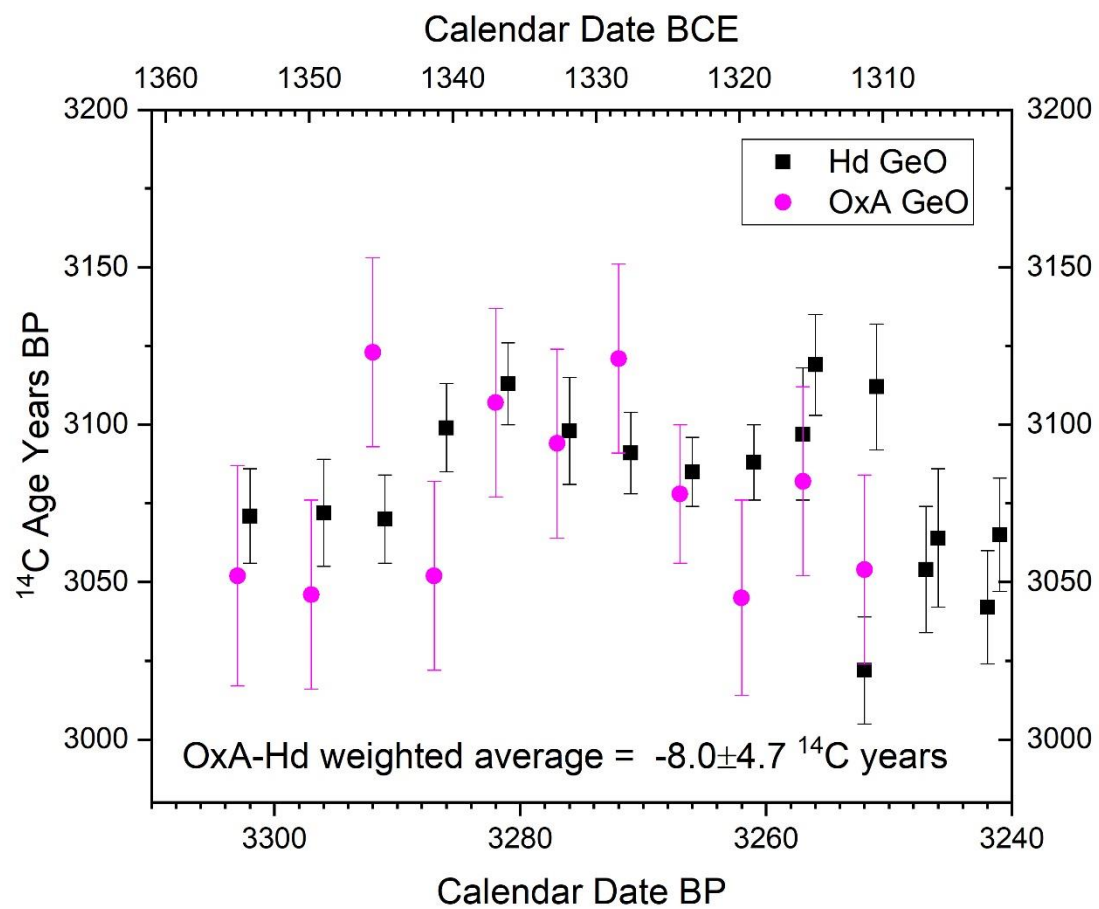

**Fig. S2. Comparison of Hd GeO LLGPC measurements (38) with OxA AMS  $^{14}\text{C}$  measurements on similar GeO (24). All error bars 1SD.**

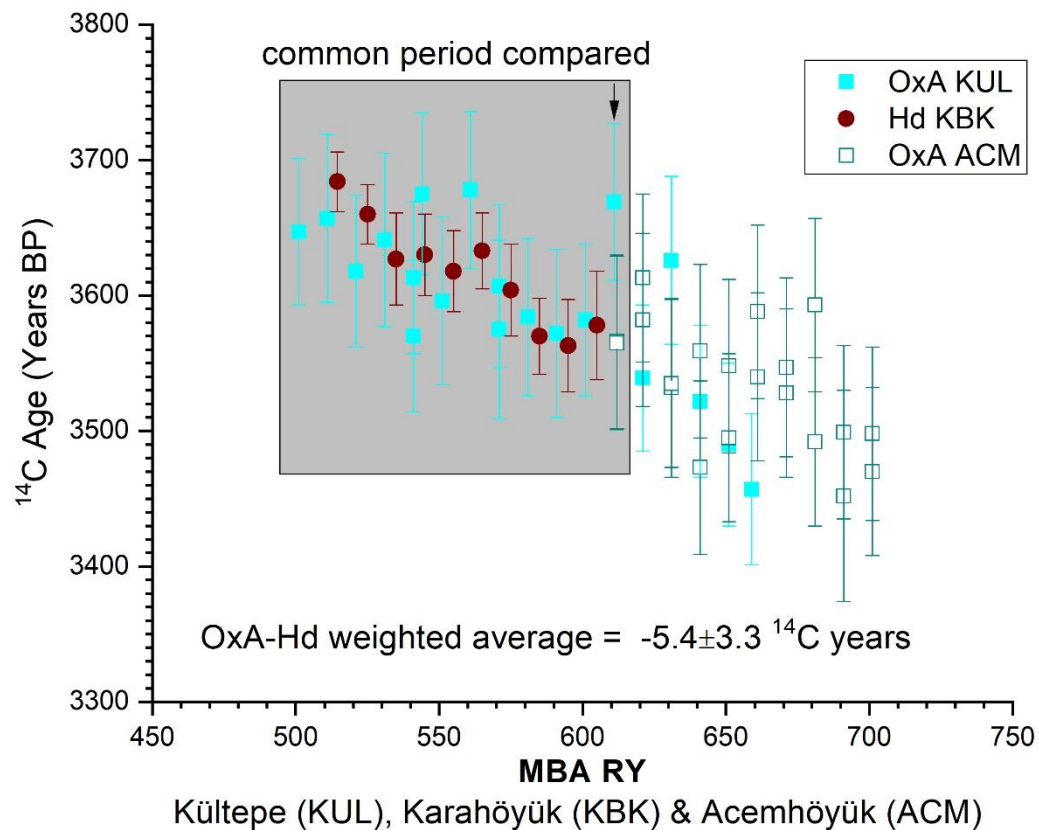

**Fig. S3. Comparison of the OxA AMS  $^{14}\text{C}$  measurements versus Hd LLGPC measurements on Anatolian juniper samples from a Middle Bronze Age dendrochronological time series built from *Juniperus* sp. samples from the archaeological sites of Kültepe, Achemhöyük, and Karahöyük (46).** We compare the overlapping datasets at 1-year interpolation, combining the three instances of pairs of OxA data on identical tree-rings. Note: one OxA measurement (OxA-30907), indicated by the arrow, is considered anomalous and an outlier (46), and we do not include it in the comparison.

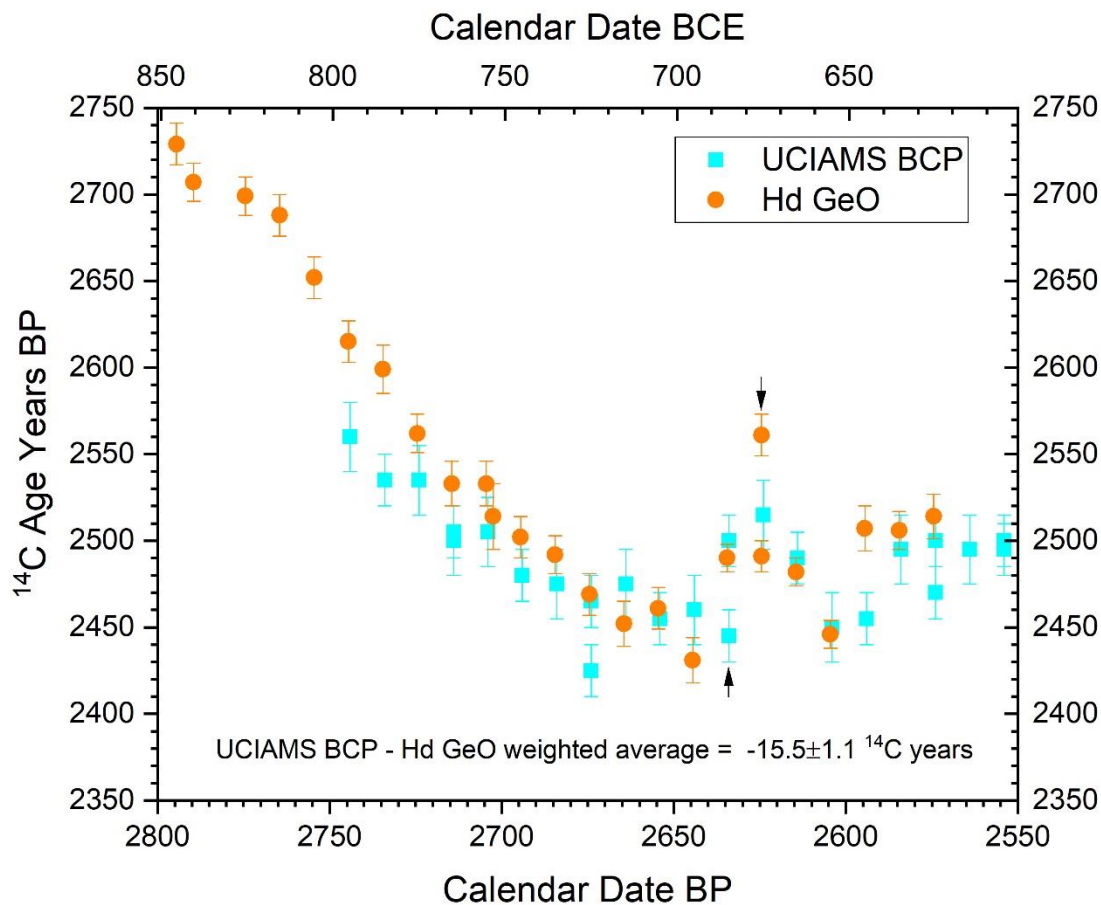

**Fig. S4. Comparison of Keck Carbon Cycle Accelerator Mass Spectrometry Laboratory, University of California, Irvine AMS  $^{14}\text{C}$  dates on known-age BCP (40) versus similar known-age GeO Hd LAGP  $^{14}\text{C}$  data (38).** All error bars 1SD. The arrows indicate where a pair of UCIAMS data for 2634 cal B.P. and a pair of Hd data for 2624.5 cal B.P. fail a  $\chi^2$  test (114). Thus rather than employ the weighted average we leave both data in for the comparison between the two series. If the two apparent outlier data ( $2445 \pm 15$   $^{14}\text{C}$  years B.P. for UCIAMS and  $2561 \pm 12$   $^{14}\text{C}$  years B.P. for Hd) nearest the two arrows are excluded, then the weighted average difference UCIAMS-Hd becomes  $-11.4 \pm 1.1$   $^{14}\text{C}$  years. Note that the UCIAMS BCP values, while similar, are in fact on average slightly more recent than the Hd GeO – in contrast to the older AA BCP values versus same age GeO (Fig. 3A) (13).

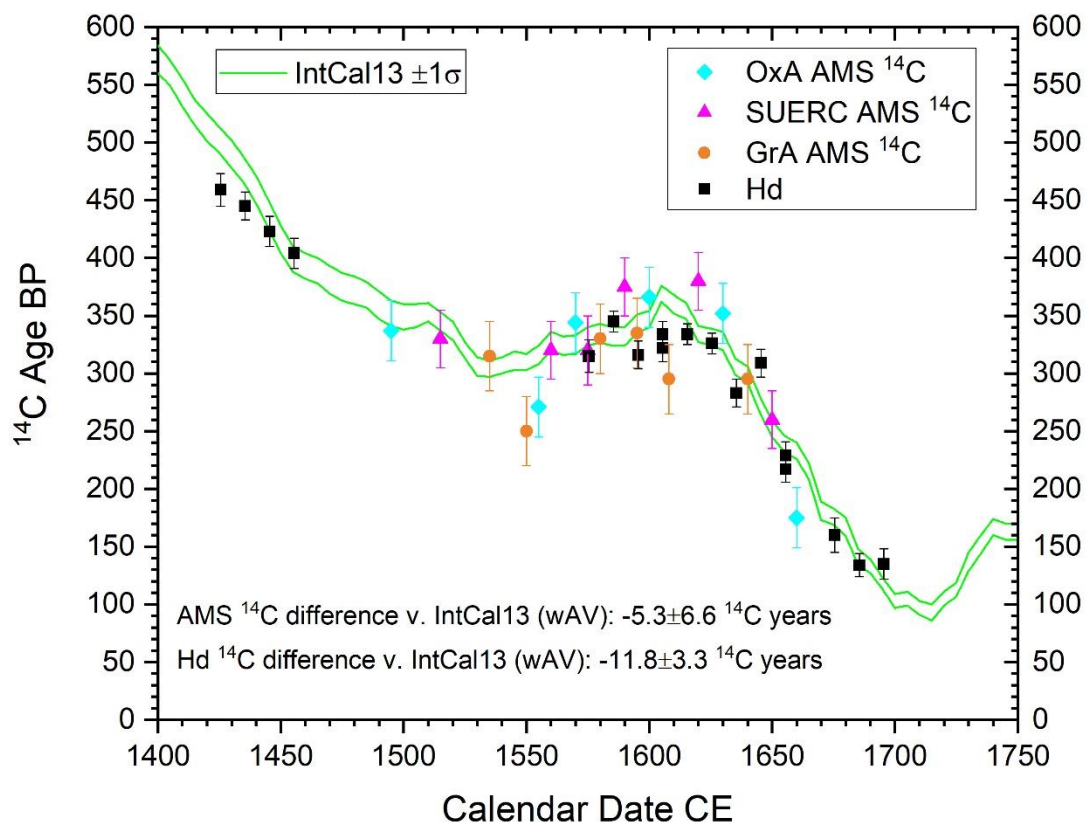

**Fig. S5. Comparison of AMS  $^{14}\text{C}$  data versus Hd LLGPC  $^{14}\text{C}$  ages for similar Swedish pine.** AMS  $^{14}\text{C}$  measurements from three laboratories (OxA, SUERC, GrA) (47) versus Hd LLGPC  $^{14}\text{C}$  data all on similar Swedish Pine (*Pinus sylvestris* L.) samples (table S1). Dates on the same tree-rings (same years or same years of Early Wood, EW, and Late Wood, LW) are combined (114). The Swedish Pine (*Pinus sylvestris* L.) in ref. 47 comes from a known-age chronology (151). The Swedish Pine samples dated at Hd come from central Sweden and were obtained and dendrochronologically dated by Håkan Grudd (for the trees employed, SILJ002, in Siljansfors tree ring set, ULLA001, in Mångberg tree ring set, and HUND001, in Hundtjärn tree ring set, see ref. 152). EW = Early Wood, LW = Late Wood.

Averages for crosses with overlaps  $\geq 10$ :  $t=9.57$ ,  $r=0.57$ ,  $tr=68.1\%$

|                                    |                                         |                                        |                                        |                                                 |                                       |                                       |                                        |                                        |                    |
|------------------------------------|-----------------------------------------|----------------------------------------|----------------------------------------|-------------------------------------------------|---------------------------------------|---------------------------------------|----------------------------------------|----------------------------------------|--------------------|
|                                    | NOC-2<br>and 9<br>1034-1192             |                                        |                                        |                                                 |                                       |                                       |                                        |                                        |                    |
| NOC-2<br>and 9                     | n=159                                   | NOC-3, 4,<br>and 18<br>1001-1205       |                                        |                                                 |                                       |                                       |                                        |                                        |                    |
| NOC-3, 4,<br>and 18                | t=12.65<br>r=0.71<br>tr=72.8%,<br>n=159 | n=205                                  | NOC-5<br>and 17<br>1009-1202           |                                                 |                                       |                                       |                                        |                                        |                    |
| NOC-5<br>and 17                    | t=7.83<br>r=0.53<br>tr=68.4%<br>n=159   | t=8.25<br>r=0.51<br>tr=68.1%<br>n=194  | n=194                                  | NOC-6, 8,<br>12, 15, 16,<br>and 20<br>1017-1203 |                                       |                                       |                                        |                                        |                    |
| NOC-6, 8,<br>12, 15, 16,<br>and 20 | t=9.41<br>r=0.60<br>tr=70.9%<br>n=159   | t=9.11<br>r=0.56<br>tr=71.5%<br>n=187  | t=10.09<br>r=0.60<br>tr=73.0%<br>n=186 | n=187                                           | NOC-7<br>1005-1191                    |                                       |                                        |                                        |                    |
| NOC-7                              | t=7.87<br>r=0.53<br>tr=63.7%<br>n=158   | t=8.96<br>r=0.55<br>tr=62.4%<br>n=187  | t=7.65<br>r=0.49<br>tr=60.7%<br>n=183  | t=11.97<br>r=0.67<br>tr=66.7%<br>n=175          | n=187                                 | NOC-10<br>1001-1198                   |                                        |                                        |                    |
| NOC-10                             | t=11.12<br>r=0.66<br>tr=69.0%<br>n=159  | t=16.87<br>r=0.77<br>tr=78.9%<br>n=198 | t=7.68<br>r=0.49<br>tr=68.0%<br>n=190  | t=9.66<br>r=0.58<br>tr=64.1%<br>n=182           | t=8.72<br>r=0.54<br>tr=66.1%<br>n=187 | n=198                                 | NOC-11<br>1022-1200                    |                                        |                    |
| NOC-11                             | t=6.41<br>r=0.46<br>tr=62.7%,<br>n=159  | t=6.71<br>r=0.45<br>tr=61.2%<br>n=179  | t=7.03<br>r=0.47<br>tr=61.2%<br>n=179  | t=9.62<br>r=0.59<br>tr=67.4%<br>n=179           | t=7.40<br>r=0.50<br>tr=59.2%<br>n=170 | t=6.37<br>r=0.43<br>tr=58.0%<br>n=177 | n=179                                  | NOC-14,<br>19, and 21<br>1001-1204     |                    |
| NOC-14,<br>19, and 21              | t=7.96<br>r=0.54<br>tr=71.5%<br>n=159   | t=9.88<br>r=0.57<br>tr=71.7%<br>n=204  | t=16.22<br>r=0.76<br>tr=81.1%<br>n=194 | t=12.45<br>r=0.68<br>tr=73.1%<br>n=187          | t=8.14<br>r=0.51<br>tr=62.9%<br>n=187 | t=8.80<br>r=0.53<br>tr=67.0%<br>n=198 | t=7.90<br>r=0.51<br>tr=65.2%<br>n=179  | n=204                                  | NOC-22<br>939-1216 |
| NOC-22                             | t=7.48<br>r=0.51<br>tr=65.8%<br>n=159   | t=9.55<br>r=0.56<br>tr=75.7%<br>n=205  | t=9.06<br>r=0.55<br>tr=69.2%<br>n=194  | t=14.70<br>r=0.73<br>tr=78.5%<br>n=187          | t=9.95<br>r=0.59<br>tr=64.5%<br>n=187 | t=9.00<br>r=0.54<br>tr=71.1%<br>n=198 | t=11.06<br>r=0.64<br>tr=68.5%<br>n=179 | t=10.87<br>r=0.61<br>tr=70.9%<br>n=204 | n=278              |

**Fig. S6. Cross-dating grid for the NOC *Quercus* sp. chronology.** Standard dendrochronological methods employed (106) with measurements, indexing and crossdating analysis carried out employing Tellervo and Corina software (107, 108).

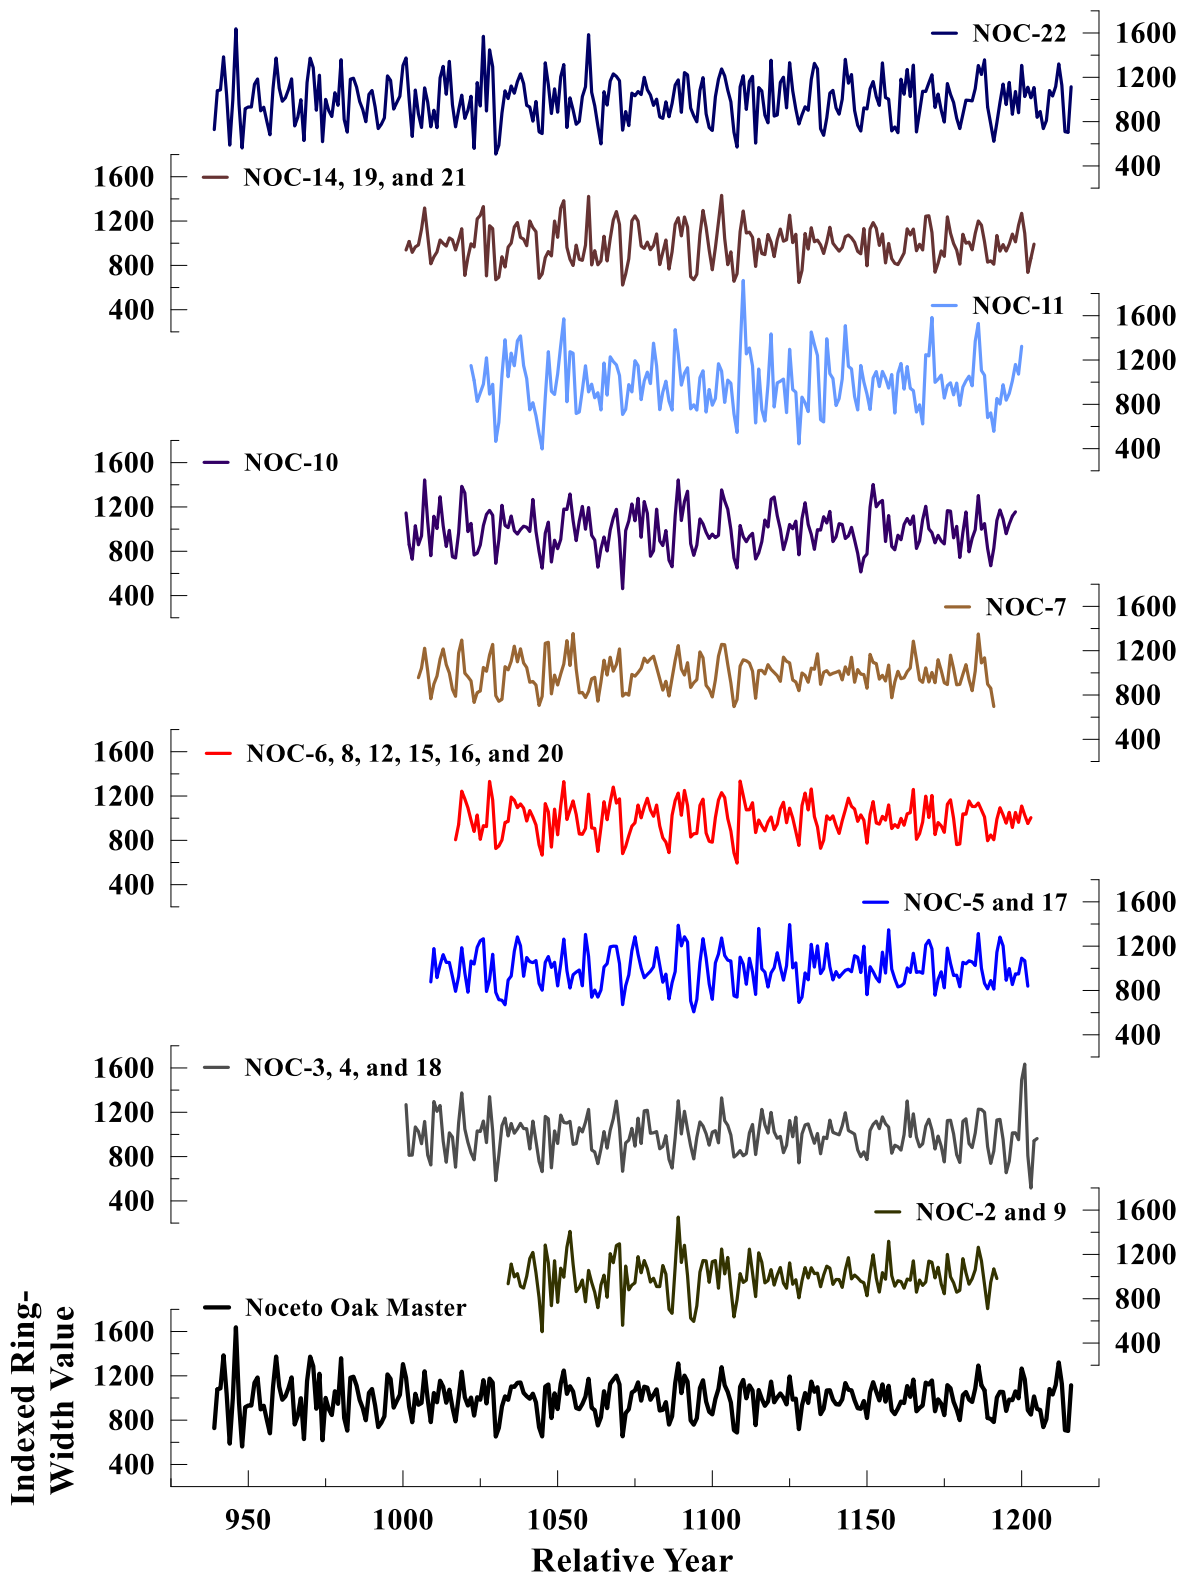

Fig. S7. The indexed tree ring series comprising the NOC *Quercus* sp. chronology.



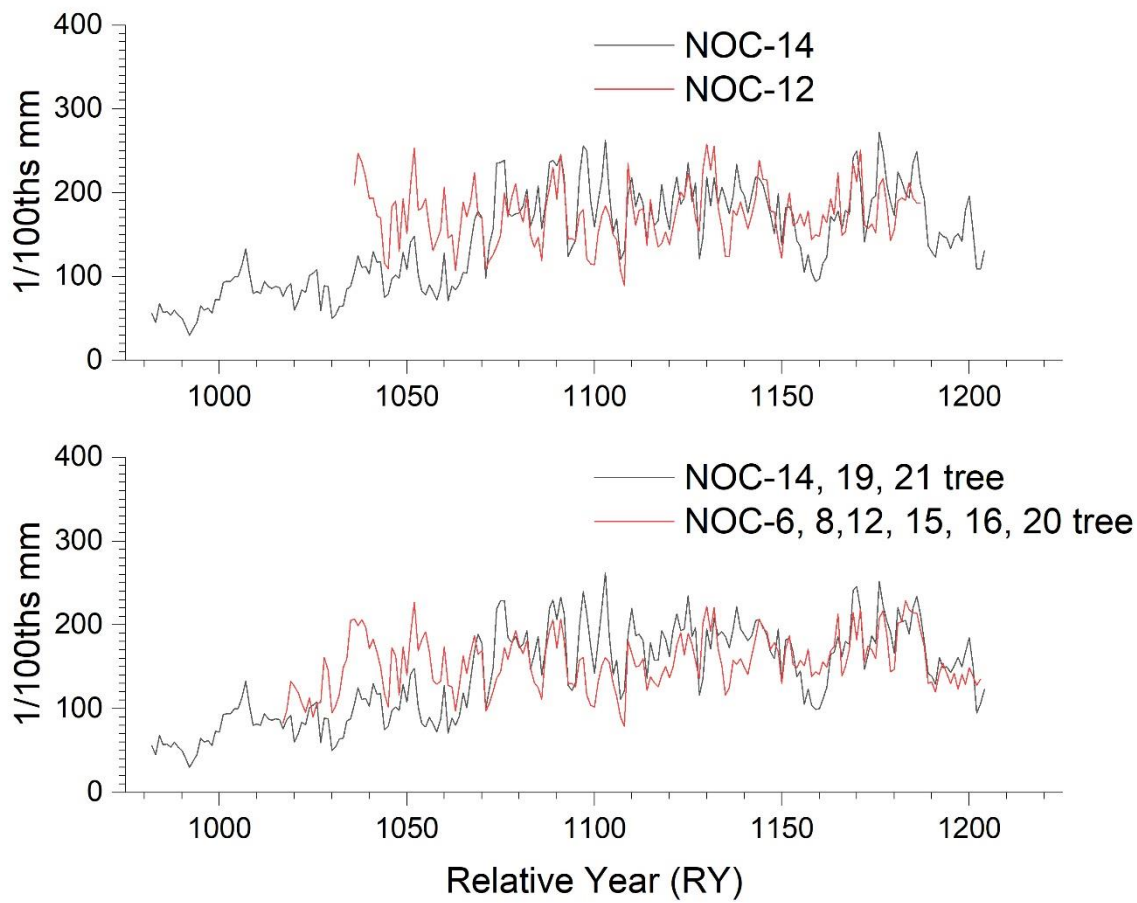

**Fig. S8. The tree ring measurements of the NOC-12 and NOC-14 samples within the NOC chronology.** We compare the NOC-12 and NOC-14 data individually, and as part of the likely same original source tree groupings that two groups of timbers belong to (NOC-6, 8, 12, 15, 16 and 20, and NOC-14, 19, 21). For the crossdating statistics, see fig. S6.

**Table S1.**  $^{14}\text{C}$  data used in this paper for Figs. 1 to 3 and figs. S1 and S5. The  $^{14}\text{C}$  laboratories and  $^{14}\text{C}$  date codes are Heidelberg (Hd), Curt-Engelhorn-Centre for Archaeometry, Mannheim (MAMS), Groningen (GrM for dates run on their Micadas AMS and GrA for previous AMS dates), University of Georgia, Center for Applied Isotope Studies (UGAMS), Tübitak MAM Earth and Marine Sciences Accelerated Mass Spectrometry Laboratory (Tübitak), ETH Zürich Laboratory of Ion Beam Physics (ETH), Scottish Universities Environmental Research Centre Radiocarbon Dating Laboratory (SUERC), and Oxford Radiocarbon Accelerator Unit (OxA). If the data have been previously published a reference is provided (otherwise this is the first publication). For samples run on (e.g.) rings 6-11 (6 rings/years) or on 10-year block of tree-rings, e.g. 1400-1409 CE, the mid-point (for plotting and analysis) is treated as the middle, that is between the 8<sup>th</sup> and 9<sup>th</sup>, or 5<sup>th</sup> and 6<sup>th</sup>, rings respectively for the two examples given. Hence the cal B.P. mid-point is 633.5 for Part 1 date 1 below, or 1404.5 for Part 4 date 1 below, as examples.

***Part 1. Hd and MAMS data on German Oak (GeO), Irish Oak (IrO), Turkish Pine (TuP), Gordion Juniperus sp.***

| cal B.P. Mid                                        | $^{14}\text{C}$ B.P. | SD | Lab ID    | Rings or Cal Years AD/-BC | Site       | Ref |
|-----------------------------------------------------|----------------------|----|-----------|---------------------------|------------|-----|
| <b><i>German Oak (GeO) second millennium CE</i></b> |                      |    |           |                           |            |     |
| 633.5                                               | 631                  | 13 | Hd-23116  | 6-11                      | Karlsruhe  | 110 |
| 625.5                                               | 586                  | 13 | Hd-23117  | 12-21                     | Karlsruhe  | 110 |
| 615.5                                               | 563                  | 13 | Hd-23118  | 22-31                     | Karlsruhe  | 110 |
| 605.5                                               | 580                  | 13 | Hd-23124  | 32-41                     | Karlsruhe  | 110 |
| 595.5                                               | 600                  | 12 | Hd-23125  | 42-51                     | Karlsruhe  | 110 |
| 585.5                                               | 629                  | 11 | Hd-23255  | 52-61                     | Karlsruhe  | 110 |
| 575.5                                               | 654                  | 13 | Hd-23126  | 62-71                     | Karlsruhe  | 110 |
| 565.5                                               | 642                  | 11 | Hd-23035  | 72-81                     | Karlsruhe  | 110 |
| 555.5                                               | 601                  | 11 | Hd-23036  | 82-91                     | Karlsruhe  | 110 |
| 545.5                                               | 549                  | 10 | Hd-23039  | 92-101                    | Karlsruhe  | 110 |
| 535.5                                               | 515                  | 14 | Hd-23119  | 102-111                   | Karlsruhe  | 110 |
| 525.5                                               | 511                  | 15 | Hd-19940  | 13-22                     | Creglingen | 110 |
| 515.5                                               | 494                  | 13 | Hd-19950  | 23-32                     | Creglingen | 110 |
| 505.5                                               | 452                  | 16 | Hd-19949  | 33-42                     | Creglingen | 110 |
| 495.5                                               | 394                  | 11 | Hd-19477  | 1-10                      | Aalen      | 110 |
| 485.5                                               | 401                  | 14 | Hd-19485  | 11-20                     | Aalen      | 110 |
| 475.5                                               | 378                  | 12 | Hd-19484  | 21-30                     | Aalen      | 110 |
| 465.5                                               | 367                  | 13 | Hd-19478  | 31-40                     | Aalen      | 110 |
| 455.5                                               | 335                  | 10 | Hd-19390  | 41-50                     | Aalen      | 110 |
| 445.5                                               | 331                  | 13 | Hd-19440  | 51-60                     | Aalen      | 110 |
| 435.5                                               | 328                  | 13 | Hd-19439  | 61-70                     | Aalen      | 110 |
| 425.5                                               | 323                  | 14 | Hd-19442  | 71-80                     | Aalen      | 110 |
| 415.5                                               | 278                  | 15 | Hd-111816 | 81-90                     | Aalen      | 110 |
| 405.5                                               | 310                  | 12 | Hd-19509  | 91-100                    | Aalen      | 110 |
| 395.5                                               | 338                  | 11 | Hd-19510  | 101-110                   | Aalen      | 110 |
| 385.5                                               | 310                  | 14 | Hd-111815 | 111-120                   | Aalen      | 110 |
| 375.5                                               | 331                  | 11 | Hd-19539  | 121-130                   | Aalen      | 110 |

|                                                    |     |    |           |           |                     |     |
|----------------------------------------------------|-----|----|-----------|-----------|---------------------|-----|
| 365.5                                              | 366 | 14 | Hd-111817 | 131-140   | Aalen               | 110 |
| 355.5                                              | 341 | 12 | Hd-19548  | 141-150   | Aalen               | 110 |
| 345.5                                              | 388 | 12 | Hd-19705  | 151-160   | Aalen               | 110 |
| 335.5                                              | 374 | 13 | Hd-19706  | 161-170   | Aalen               | 110 |
| 325.5                                              | 371 | 14 | Hd-19737  | 171-180   | Aalen               | 110 |
| 315.5                                              | 319 | 13 | Hd-19755  | 181-190   | Aalen               | 110 |
| 305.5                                              | 265 | 12 | Hd-19756  | 191-200   | Aalen               | 110 |
| 295.5                                              | 243 | 11 | Hd-23056  | 100-109   | Regensburg          | 110 |
| 285.5                                              | 211 | 13 | Hd-23057  | 110-119   | Regensburg          | 110 |
| 275.5                                              | 151 | 12 | Hd-23055  | 120-129   | Regensburg          | 110 |
| 265.5                                              | 155 | 13 | Hd-23059  | 130-139   | Regensburg          | 110 |
| 255.5                                              | 131 | 12 | Hd-23073  | 140-149   | Regensburg          | 110 |
| 245.5                                              | 92  | 12 | Hd-23072  | 150-159   | Regensburg          | 110 |
| 235.5                                              | 100 | 11 | Hd-23051  | 160-169   | Regensburg          | 110 |
| 225.5                                              | 150 | 12 | Hd-23048  | 170-179   | Regensburg          | 110 |
| 215.5                                              | 172 | 10 | Hd-23047  | 180-189   | Regensburg          | 110 |
| 205.5                                              | 180 | 13 | Hd-23061  | 190-199   | Regensburg          | 110 |
| 195.5                                              | 180 | 10 | Hd-23053  | 200-209   | Regensburg          | 110 |
| 185.5                                              | 168 | 12 | Hd-23054  | 210-219   | Regensburg          | 110 |
| 175.5                                              | 205 | 14 | Hd-23062  | 220-229   | Regensburg          | 110 |
| 165.5                                              | 189 | 12 | Hd-22883  | 161-170   | Biberach            | 110 |
| 155.5                                              | 172 | 10 | Hd-22884  | 151-160   | Biberach            | 110 |
| 145.5                                              | 145 | 10 | Hd-22885  | 141-150   | Biberach            | 110 |
| 135.5                                              | 119 | 11 | Hd-22886  | 131-140   | Biberach            | 110 |
| 125.5                                              | 71  | 11 | Hd-22888  | 121-130   | Biberach            | 110 |
| 115.5                                              | 95  | 10 | Hd-22889  | 111-120   | Biberach            | 110 |
| 105.5                                              | 105 | 10 | Hd-22890  | 101-110   | Biberach            | 110 |
| 95.5                                               | 123 | 8  | Hd-22925  | 91-100    | Biberach            | 110 |
| 85.5                                               | 109 | 10 | Hd-22891  | 81-90     | Biberach            | 110 |
| <b><i>Irish Oak (IrO) second millennium CE</i></b> |     |    |           |           |                     |     |
| 85.5                                               | 116 | 9  | Hd-23354  | 1860-1869 | Q8513 Slanes Castle |     |
| 95.5                                               | 99  | 10 | Hd-23427  | 1850-1859 | Q8513 Slanes Castle |     |
| 105.5                                              | 136 | 11 | Hd-23361  | 1840-1849 | Q8513 Slanes Castle |     |
| 115.5                                              | 93  | 11 | Hd-23420  | 1830-1839 | Q8513 Slanes Castle |     |
| 125.5                                              | 97  | 10 | Hd-23417  | 1820-1829 | Q8513 Slanes Castle |     |
| 135.5                                              | 91  | 10 | Hd-23428  | 1810-1819 | Q8513 Slanes Castle |     |
| 145.5                                              | 158 | 10 | Hd-23429  | 1800-1809 | Q8513 Slanes Castle |     |
| 155.5                                              | 194 | 10 | Hd-23416  | 1790-1799 | Q8513 Slanes Castle |     |
| 165.5                                              | 203 | 9  | Hd-23437  | 1780-1789 | Q8513 Slanes Castle |     |
| 175.5                                              | 170 | 11 | Hd-23415  | 1770-1779 | Q8513 Slanes Castle |     |
| 185.5                                              | 182 | 11 | Hd-23356  | 1760-1769 | Q8513 Slanes Castle |     |
| 195.5                                              | 167 | 11 | Hd-23409  | 1750-1759 | Q8513 Slanes Castle |     |

|                                                       |     |     |                |               |                                    |    |
|-------------------------------------------------------|-----|-----|----------------|---------------|------------------------------------|----|
| 205.5                                                 | 205 | 9   | Hd-23360       | 1740-1749     | Q8513 Slanes Castle                |    |
| 215.5                                                 | 153 | 9   | Hd-23469       | 1730-1739     | Q10374 Belvoi Park Forest          |    |
| 225.5                                                 | 127 | 9   | Hd-23467       | 1720-1729     | Q10374 Belvoi Park Forest          |    |
| 235.5                                                 | 82  | 11  | Hd-23473       | 1710-1719     | Q10374 Belvoi Park Forest          |    |
| 245.5                                                 | 112 | 10  | Hd-23447       | 1700-1709     | Q10374 Belvoi Park Forest          |    |
| 255.5                                                 | 120 | 9   | Hd-23445       | 1690-1699     | Q1030 Gloverstown House Co. Antrim |    |
| 265.5                                                 | 128 | 12  | Hd-23476       | 1680-1689     | Q1030 Gloverstown House Co. Antrim |    |
| 275.5                                                 | 162 | 10  | Hd-23465       | 1670-1679     | Q1030 Gloverstown House Co. Antrim |    |
| 285.5                                                 | 191 | 10  | Hd-23452       | 1660-1669     | Q10053 Dan Winter's House          |    |
| 295.5                                                 | 237 | 10  | Hd-23449       | 1650-1659     | Q10053 Dan Winter's House          |    |
| 305.5                                                 | 254 | 10  | Hd-23451       | 1640-1649     | Q10053 Dan Winter's House          |    |
| 315.5                                                 | 308 | 11  | Hd-23446       | 1630-1639     | Q10053 Dan Winter's House          |    |
| 325.5                                                 | 325 | 10  | Hd-23468       | 1620-1629     | Q10053 Dan Winter's House          |    |
| 335.5                                                 | 352 | 10  | Hd-23440       | 1610-1619     | Q934 Pottage House, Co. Antrim     |    |
| 345.5                                                 | 358 | 10  | Hd-23453       | 1600-1609     | Q934 Pottage House, Co. Antrim     |    |
| <b><i>Turkish Pine (TuP) second millennium CE</i></b> |     |     |                |               |                                    |    |
| 645.5                                                 | 651 | 10  | Hd-22611       | 1309-1300     | CAT-1                              | 27 |
| 642                                                   | 657 | 19  | Hd-22810       | 1309-1307     | CAT-1                              | 27 |
| 635.5                                                 | 637 | 9   | Hd-22618       | 1319-1310     | CAT-1                              | 27 |
| 625.5                                                 | 589 | 10  | Hd-22619       | 1329-1320     | CAT-1                              | 27 |
| 615.5                                                 | 576 | 10  | Hd-22620       | 1339-1330     | CAT-1                              | 27 |
| 605.5                                                 | 568 | 9   | Hd-22621       | 1349-1340     | CAT-1                              | 27 |
| 595.5                                                 | 591 | 12  | Hd-22622       | 1359-1350     | CAT-1                              | 27 |
| 585.5                                                 | 615 | 10  | Hd-22623       | 1369-1360     | CAT-1                              | 27 |
| 575.5                                                 | 676 | 10  | Hd-22648       | 1379-1370     | CAT-1                              | 27 |
| 565.5                                                 | 623 | 11  | Hd-22650       | 1389-1380     | CAT-1                              | 27 |
| 555.5                                                 | 584 | 10  | Hd-22671       | 1399-1390     | CAT-1                              | 27 |
| 545.5                                                 | 560 | 10  | Hd-22672       | 1409-1400     | CAT-1                              | 27 |
| 535.5                                                 | 517 | 9   | Hd-22673       | 1419-1410     | CAT-1                              | 27 |
| 525.5                                                 | 463 | 9.1 | Hd-21088+19972 | 1429.5-1420.5 | CAT-15 + CAT-1                     | 27 |
| 515.5                                                 | 452 | 8.8 | Hd-20892+19974 | 1439.5-1430.5 | CAT-15 + CAT-1                     | 27 |
| 505.5                                                 | 455 | 14  | Hd-19970       | 1449.5-1440.5 | CAT-1                              | 27 |
| 495.5                                                 | 406 | 9.2 | Hd-21157+19538 | 1459-1450     | CAT-15 + CAT-1                     | 27 |
| 485.5                                                 | 415 | 15  | Hd-19576       | 1469-1460     | CAT-1                              | 27 |
| 475.5                                                 | 404 | 9.8 | Hd-21245+19506 | 1479-1470     | CAT-15 + CAT-1                     | 27 |
| 465.5                                                 | 396 | 11  | Hd-21246+19505 | 1489-1480     | CAT-15 + CAT-1                     | 27 |
| 455.5                                                 | 330 | 13  | Hd-19481       | 1499-1490     | CAT-15 + CAT-1                     | 27 |
| 445.5                                                 | 354 | 8.1 | Hd-21178+19482 | 1509-1500     | CAT-15 + CAT-1                     | 27 |
| 435.5                                                 | 333 | 12  | Hd-19483       | 1519-1510     | CAT-1                              | 27 |
| 429.5                                                 | 331 | 11  | Hd-24695       | 1526-1515     | CAT-15                             | 27 |
| 425.5                                                 | 342 | 12  | Hd-19508       | 1529-1520     | CAT-1                              | 27 |

|       |      |     |                |           |                |    |
|-------|------|-----|----------------|-----------|----------------|----|
| 415.5 | 304  | 8.6 | Hd-21243+19499 | 1539-1530 | CAT-15 + CAT-1 | 27 |
| 405.5 | 313  | 15  | Hd-19537       | 1549-1540 | CAT-1          | 27 |
| 395.5 | 326  | 11  | Hd-19580       | 1559-1550 | CAT-1          | 27 |
| 385.5 | 2118 | 13  | Hd-19521       | 1569-1560 | CAT-1          | 27 |
| 375.5 | 351  | 12  | Hd-19549       | 1579-1570 | CAT-1          | 27 |
| 365.5 | 351  | 12  | Hd-19583       | 1589-1580 | CAT-1          | 27 |
| 355.5 | 343  | 13  | Hd-19551       | 1599-1590 | CAT-1          | 27 |
| 345.5 | 356  | 10  | Hd-21244+19550 | 1609-1600 | CAT-15 + CAT-1 | 27 |
| 335.5 | 366  | 15  | Hd-19601       | 1619-1610 | CAT-1          | 27 |
| 325.5 | 342  | 11  | Hd-21349+19586 | 1629-1620 | CAT-15 + CAT-1 | 27 |
| 315.5 | 289  | 12  | Hd-20982+19563 | 1639-1630 | CAT-15 + CAT-1 | 27 |
| 305.5 | 246  | 13  | Hd-19597       | 1649-1640 | CAT-1          | 27 |
| 295.5 | 238  | 12  | Hd-22674       | 1659-1650 | CAT-1          | 27 |
| 285.5 | 211  | 11  | Hd-22726       | 1669-1660 | CAT-1          | 27 |
| 275.5 | 170  | 13  | Hd-22723       | 1679-1670 | CAT-1          | 27 |
| 265.5 | 157  | 13  | Hd-22755       | 1689-1680 | CAT-1          | 27 |
| 255.5 | 103  | 12  | Hd-22759       | 1699-1690 | CAT-1          | 27 |
| 245.5 | 128  | 10  | Hd-22783       | 1709-1700 | CAT-1          | 27 |
| 235.5 | 100  | 11  | Hd-22728       | 1719-1710 | CAT-1          | 27 |
| 225.5 | 108  | 12  | Hd-22784       | 1729-1720 | CAT-1          | 27 |
| 215.5 | 147  | 12  | Hd-22785       | 1739-1730 | CAT-1          | 27 |
| 205.5 | 179  | 13  | Hd-22786       | 1749-1740 | CAT-1          | 27 |
| 195.5 | 156  | 14  | Hd-22791       | 1759-1750 | CAT-1          | 27 |
| 185.5 | 177  | 15  | Hd-22753       | 1769-1760 | CAT-1          | 27 |
| 175.5 | 197  | 15  | Hd-22758       | 1779-1770 | CAT-1          | 27 |
| 165.5 | 185  | 17  | Hd-22792       | 1789-1780 | CAT-1          | 27 |
| 155.5 | 196  | 14  | Hd-22797       | 1799-1790 | CAT-1          | 27 |
| 145.5 | 138  | 11  | Hd-22800       | 1809-1800 | CAT-1          |    |
| 135.5 | 86   | 13  | Hd-22801       | 1819-1810 | CAT-1          |    |
| 135   | 81   | 9   | Hd-23480       | 1820-1810 | CAT-6          |    |
| 125.5 | 71   | 13  | Hd-22807       | 1829-1820 | CAT-1A         |    |
| 125   | 87   | 9   | Hd-23411       | 1830-1820 | CAT-6          |    |
| 115.5 | 60   | 13  | Hd-22808       | 1839-1830 | CAT-1A         |    |
| 115.5 | 72   | 10  | Hd-24458       | 1839-1830 | CAT-1          |    |
| 115   | 85   | 11  | Hd-22410       | 1840-1830 | CAT-6          |    |
| 105.5 | 87   | 12  | Hd-24463       | 1849-1840 | CAT-1          |    |
| 105   | 104  | 9   | Hd-23414       | 1850-1840 | CAT-6          |    |
| 98    | 131  | 17  | MAMS-36594     | 1850-1854 | CAT-6          |    |
| 93    | 101  | 17  | MAMS-36595     | 1855-1859 | CAT-6          |    |
| 88    | 144  | 17  | MAMS-36596     | 1860-1864 | CAT-1          |    |
| 83    | 112  | 18  | MAMS-36597     | 1865-1869 | CAT-1          |    |
| 68    | 109  | 18  | MAMS-36598     | 1880-1884 | CAT-6          |    |

|                                                   |      |    |            |                |                  |    |
|---------------------------------------------------|------|----|------------|----------------|------------------|----|
| 63                                                | 96   | 17 | MAMS-36599 | 1885-1889      | CAT-6            |    |
| 58                                                | 102  | 17 | MAMS-36600 | 1890-1894      | CAT-6            |    |
| 53                                                | 83   | 17 | MAMS-36601 | 1895-1899      | CAT-6            |    |
| 48                                                | 72   | 17 | MAMS-36602 | 1900-1904      | CAT-6            |    |
| 43                                                | 107  | 17 | MAMS-36603 | 1905-1909      | CAT-6            |    |
| 38                                                | 128  | 17 | MAMS-36604 | 1910-1914      | CAT-6            |    |
| 33                                                | 114  | 17 | MAMS-36605 | 1915-1919      | CAT-6            |    |
| <b>German Oak (GeO) 3655-3431 B.P. in Fig. 2B</b> |      |    |            |                |                  |    |
| 3654.5                                            | 3471 | 15 | Hd-19803   | -1710 to -1701 | Sand 21          | 38 |
| 3644.5                                            | 3408 | 15 | Hd-20053   | -1700 to -1691 | Sand 21          | 38 |
| 3644.5                                            | 3424 | 13 | Hd-22290   | -1700 to -1691 | Ebensfeld (1) 99 |    |
| 3634.5                                            | 3396 | 15 | Hd-19800   | -1690 to -1681 | Sand 21          | 38 |
| 3634.5                                            | 3376 | 13 | Hd-22219   | -1690 to -1681 | Ebensfeld (2) 99 |    |
| 3624.5                                            | 3403 | 16 | Hd-20054   | -1680 to -1671 | Sand 21          | 38 |
| 3624.5                                            | 3396 | 13 | Hd-21587   | -1680 to -1671 | Ebensfeld (3) 99 |    |
| 3614.5                                            | 3386 | 15 | Hd-19804   | -1670 to -1661 | Sand 21          | 38 |
| 3614.5                                            | 3374 | 20 | Hd-21589   | -1670 to -1661 | Ebensfeld (4) 99 |    |
| 3614.5                                            | 3409 | 21 | Hd-20098   | -1670 to -1661 | Knetzgau 40      | 38 |
| 3604.5                                            | 3385 | 16 | Hd-19811   | -1660 to -1651 | Knetzgau 40      | 38 |
| 3604.5                                            | 3346 | 14 | Hd-21588   | -1660 to -1651 | Ebensfeld (5) 99 |    |
| 3596                                              | 3358 | 23 | Hd-26629   | -1649 to -1645 | Unterbrunn 12 A  | 38 |
| 3594.5                                            | 3364 | 15 | Hd-20052   | -1650 to -1641 | Knetzgau 40      | 38 |
| 3591                                              | 3369 | 19 | Hd-26628   | -1644 to -1640 | Unterbrunn 12 A  | 38 |
| 3586                                              | 3326 | 18 | Hd-26647   | -1639 to -1635 | Unterbrunn 12 A  | 38 |
| 3584.5                                            | 3368 | 16 | Hd-19858   | -1640 to -1631 | Knetzgau 40      | 38 |
| 3581                                              | 3344 | 17 | Hd-26646   | -1634 to -1630 | Unterbrunn 12 A  | 38 |
| 3576                                              | 3354 | 15 | Hd-26660   | -1629 to -1625 | Unterbrunn 12 A  | 38 |
| 3574.5                                            | 3343 | 16 | Hd-20123   | -1630 to -1621 | Knetzgau 40      | 38 |
| 3571                                              | 3313 | 15 | Hd-26661   | -1624 to -1620 | Unterbrunn 12 A  | 38 |
| 3566                                              | 3325 | 14 | Hd-26665   | -1619 to -1615 | Unterbrunn 12 A  | 38 |
| 3564.5                                            | 3340 | 17 | Hd-20010   | -1620 to -1611 | Knetzgau 40      | 38 |
| 3561                                              | 3296 | 12 | Hd-26666   | -1614 to -1610 | Unterbrunn 12 A  | 38 |
| 3556                                              | 3282 | 12 | Hd-26696   | -1609 to -1605 | Unterbrunn 12 A  | 38 |
| 3554.5                                            | 3279 | 14 | Hd-19997   | -1610 to -1601 | Knetzgau 40      | 38 |
| 3551                                              | 3297 | 14 | Hd-26697   | -1604 to -1600 | Unterbrunn 12 A  | 38 |
| 3546                                              | 3290 | 13 | Hd-26723   | -1599 to -1595 | Unterbrunn 12 A  | 38 |
| 3544.5                                            | 3280 | 14 | Hd-20012   | -1600 to -1591 | Knetzgau 40      | 38 |
| 3541                                              | 3230 | 19 | Hd-26725   | -1594 to -1590 | Unterbrunn 12 A  | 38 |
| 3541                                              | 3271 | 14 | Hd-27057   | -1594 to -1590 | Unterbrunn 24 B2 | 38 |
| 3536                                              | 3273 | 19 | Hd-26727   | -1589 to -1585 | Unterbrunn 12 A  | 38 |
| 3536                                              | 3261 | 14 | Hd-27056   | -1589 to -1585 | Unterbrunn 24 B2 | 38 |
| 3534.5                                            | 3303 | 15 | Hd-20089   | -1590 to -1581 | Knetzgau 40      | 38 |

|                                           |      |    |           |                |                  |    |
|-------------------------------------------|------|----|-----------|----------------|------------------|----|
| 3531                                      | 3293 | 12 | Hd-27052  | -1584 to -1580 | Unterbrunn 24 B2 | 38 |
| 3529.5                                    | 3278 | 21 | Hd-26728  | -1584 to -1577 | Unterbrunn 12 A  | 38 |
| 3526                                      | 3312 | 16 | Hd-27038  | -1579 to -1575 | Unterbrunn 24 B2 | 38 |
| 3524.5                                    | 3300 | 16 | Hd-20000  | -1580 to -1571 | Knetzgau 40      | 38 |
| 3521                                      | 3302 | 13 | Hd-27053  | -1574 to -1570 | Unterbrunn 24 B2 | 38 |
| 3516                                      | 3288 | 15 | Hd-26852  | -1569 to -1565 | Unterbrunn 24 B2 | 38 |
| 3514.5                                    | 3326 | 16 | Hd-20094  | -1570 to -1561 | Knetzgau 40      | 38 |
| 3511                                      | 3286 | 15 | Hd-26853  | -1564 to -1560 | Unterbrunn 24 B2 | 38 |
| 3506                                      | 3283 | 13 | Hd-26839  | -1559 to -1555 | Unterbrunn 25 B  | 38 |
| 3504.5                                    | 3276 | 16 | Hd-20097  | -1560 to -1551 | Knetzgau 40      | 38 |
| 3501                                      | 3311 | 12 | Hd-26840  | -1554 to -1550 | Unterbrunn 25 B  | 38 |
| 3501                                      | 3271 | 13 | Hd-28134  | -1554 to -1550 | Knetzgau 3       |    |
| 3496                                      | 3263 | 16 | Hd-26809  | -1549 to -1545 | Unterbrunn 25 B  | 38 |
| 3496                                      | 3311 | 12 | Hd-28132  | -1549 to -1545 | Knetzgau 3       |    |
| 3494.5                                    | 3307 | 17 | Hd-20009  | -1550 to -1541 | Knetzgau 40      | 38 |
| 3491                                      | 3259 | 15 | Hd-26812  | -1544 to -1540 | Unterbrunn 25 B  | 38 |
| 3491                                      | 3269 | 13 | Hd-28131  | -1544 to -1540 | Knetzgau 3       |    |
| 3486                                      | 3300 | 15 | Hd-26813  | -1539 to -1535 | Unterbrunn 25 B  | 38 |
| 3486                                      | 3288 | 11 | Hd-28130  | -1539 to -1535 | Knetzgau 3       |    |
| 3484.5                                    | 3297 | 16 | Hd-20102  | -1540 to -1531 | Knetzgau 40      | 38 |
| 3481                                      | 3294 | 20 | Hd-26772  | -1534 to -1530 | Unterbrunn 25 B  | 38 |
| 3476                                      | 3246 | 12 | Hd-26771  | -1529 to -1525 | Unterbrunn 25 B  | 38 |
| 3474.5                                    | 3248 | 17 | Hd-19996  | -1530 to -1521 | Knetzgau 40      | 38 |
| 3471                                      | 3266 | 14 | Hd-26770  | -1524 to -1520 | Unterbrunn 25 B  | 38 |
| 3466                                      | 3262 | 22 | Hd-26763  | -1519 to -1515 | Unterbrunn 25 B  | 38 |
| 3464.5                                    | 3254 | 14 | Hd-20122  | -1520 to -1511 | Ebensfeld        | 38 |
| 3461                                      | 3284 | 14 | Hd-26764  | -1514 to -1510 | Unterbrunn 25 B  | 38 |
| 3456                                      | 3228 | 16 | Hd-26765  | -1509 to -1505 | Unterbrunn 25 B  | 38 |
| 3454.5                                    | 3276 | 16 | Hd-20129  | -1510 to -1501 | Ebensfeld        | 38 |
| 3451                                      | 3208 | 21 | Hd-26739  | -1504 to -1500 | Unterbrunn 25 B  | 38 |
| 3451                                      | 3236 | 17 | Hd-27073  | -1504 to -1500 | Unterbrunn 3 D   | 38 |
| 3446                                      | 3199 | 13 | Hd-27076  | -1499 to -1495 | Unterbrunn 3 D   | 38 |
| 3444.5                                    | 3206 | 15 | Hd-19994  | -1500 to -1491 | Knetzgau 40      | 38 |
| 3441                                      | 3193 | 13 | Hd-27065  | -1494 to -1490 | Unterbrunn 3 D   | 38 |
| 3436                                      | 3183 | 15 | Hd-27066  | -1489 to -1485 | Unterbrunn 3 D   | 38 |
| 3431                                      | 3197 | 15 | Hd-27075  | -1484 to -1480 | Unterbrunn 3 D   | 38 |
| <b>Gordion (GOR) data, Relative Years</b> |      |    |           |                |                  |    |
| 776.5                                     | 3430 | 14 | Hd- 19793 | 772-781        | GOR- 161         | 27 |
| 786.5                                     | 3409 | 13 | Hd- 20171 | 782-791        | GOR- 161         | 27 |
| 796.5                                     | 3432 | 16 | Hd- 19799 | 792-801        | GOR- 161         | 27 |
| 806.5                                     | 3426 | 13 | Hd- 20160 | 802-811        | GOR- 161         | 27 |
| 816.5                                     | 3403 | 18 | Hd- 19983 | 812-821        | GOR- 161         | 27 |

|        |      |    |           |           |          |    |
|--------|------|----|-----------|-----------|----------|----|
| 826.5  | 3335 | 16 | Hd- 19993 | 822-831   | GOR- 161 | 27 |
| 836.5  | 3348 | 17 | Hd- 20163 | 832-841   | GOR- 161 | 27 |
| 846.5  | 3401 | 16 | Hd- 19969 | 842-851   | GOR- 161 | 27 |
| 856.5  | 3372 | 13 | Hd- 20158 | 852-861   | GOR- 161 | 27 |
| 866.5  | 3356 | 18 | Hd- 19982 | 862-871   | GOR- 161 | 27 |
| 876.5  | 3342 | 16 | Hd- 20250 | 872-881   | GOR- 161 | 27 |
| 886.5  | 3334 | 18 | Hd- 19984 | 882-891   | GOR- 161 | 27 |
| 896.5  | 3336 | 19 | Hd- 20251 | 892-901   | GOR- 161 | 27 |
| 906.5  | 3235 | 17 | Hd- 19990 | 902-911   | GOR- 161 | 27 |
| 906.5  | 3280 | 16 | Hd- 24489 | 902-911   | GOR- 76  | 27 |
| 916.5  | 3302 | 14 | Hd- 20252 | 912-921   | GOR- 161 | 27 |
| 916.5  | 3329 | 14 | Hd- 24487 | 912-921   | GOR- 76  | 27 |
| 925.5  | 3323 | 22 | Hd- 26027 | 921-930   | GOR- 161 | 27 |
| 926.5  | 3284 | 17 | Hd- 20134 | 922-931   | GOR- 161 | 27 |
| 926.5  | 3308 | 16 | Hd- 24488 | 922-931   | GOR- 76  | 27 |
| 935.5  | 3329 | 23 | Hd- 26028 | 931-940   | GOR- 161 | 27 |
| 936.5  | 3338 | 18 | Hd- 20137 | 932-941   | GOR- 161 | 27 |
| 936.5  | 3296 | 18 | Hd- 24256 | 932-941   | GOR- 76  | 27 |
| 945.5  | 3330 | 21 | Hd- 26051 | 941-950   | GOR- 161 | 27 |
| 946.5  | 3289 | 18 | Hd- 20135 | 942-951   | GOR- 161 | 27 |
| 946.5  | 3288 | 22 | Hd- 24258 | 942-951   | GOR- 76  | 27 |
| 956.5  | 3310 | 18 | Hd- 20136 | 952-961   | GOR- 161 | 27 |
| 956.5  | 3322 | 19 | Hd- 24257 | 952-961   | GOR- 76  | 27 |
| 966.5  | 3292 | 16 | Hd- 20253 | 962-971   | GOR- 161 | 27 |
| 966.5  | 3319 | 18 | Hd- 24366 | 962-971   | GOR- 76  | 27 |
| 976.5  | 3292 | 23 | Hd- 20623 | 972-981   | GOR- 161 | 27 |
| 986.5  | 3223 | 19 | Hd- 19973 | 982-991   | GOR- 161 | 27 |
| 1005.5 | 3257 | 18 | Hd- 26050 | 1001-1010 | GOR- 87  | 27 |
| 1015.5 | 3218 | 18 | Hd- 26049 | 1011-1020 | GOR- 87  | 27 |
| 1025.5 | 3203 | 20 | Hd- 26069 | 1021-1030 | GOR- 87  | 27 |
| 1035.5 | 3210 | 21 | Hd- 26068 | 1031-1040 | GOR- 87  | 27 |
| 1045.5 | 3202 | 17 | Hd- 26065 | 1041-1050 | GOR- 87  | 27 |
| 1054.5 | 3160 | 22 | Hd- 25786 | 1050-1059 | GOR- 3   | 27 |
| 1064.5 | 3195 | 21 | Hd- 25781 | 1060-1069 | GOR- 3   | 27 |
| 1074.5 | 3157 | 32 | Hd- 25782 | 1070-1079 | GOR- 3   | 27 |
| 1084.5 | 3124 | 21 | Hd- 25769 | 1080-1089 | GOR- 3   | 27 |
| 1094.5 | 3134 | 19 | Hd- 25768 | 1090-1099 | GOR- 3   | 27 |
| 1104.5 | 3050 | 20 | Hd- 25766 | 1100-1109 | GOR- 3   | 27 |
| 1114.5 | 3072 | 17 | Hd- 25748 | 1110-1119 | GOR- 3   | 27 |
| 1124.5 | 3046 | 18 | Hd- 25747 | 1120-1129 | GOR- 3   | 27 |
| 1134.5 | 3074 | 18 | Hd- 25745 | 1130-1139 | GOR- 3   | 27 |
| 1135   | 3106 | 18 | Hd- 21774 | 1130-1140 | GOR- 3   | 27 |



|        |      |    |           |           |          |    |
|--------|------|----|-----------|-----------|----------|----|
| 1135   | 3062 | 24 | Hd- 21711 | 1130-1140 | GOR- 161 | 27 |
| 1144.5 | 3049 | 16 | Hd- 25723 | 1140-1149 | GOR- 3   | 27 |
| 1145.5 | 3045 | 21 | Hd- 26097 | 1141-1150 | GOR- 36  | 27 |
| 1155   | 3140 | 38 | Hd- 21720 | 1150-1160 | GOR- 161 | 27 |
| 1155.5 | 3046 | 21 | Hd- 26098 | 1151-1160 | GOR- 36  | 27 |
| 1175   | 3122 | 18 | Hd- 21721 | 1170-1180 | GOR- 161 | 27 |
| 1185   | 3144 | 18 | Hd- 21722 | 1180-1190 | GOR- 161 | 27 |
| 1194.5 | 3088 | 13 | Hd- 24558 | 1190-1199 | GOR- 3   | 27 |
| 1195   | 3060 | 19 | Hd- 21761 | 1190-1200 | GOR- 161 | 27 |
| 1204.5 | 3055 | 13 | Hd- 24556 | 1200-1209 | GOR- 3   | 27 |
| 1214.5 | 3090 | 18 | Hd- 24570 | 1210-1219 | GOR- 3   | 27 |
| 1215   | 3058 | 25 | Hd- 21712 | 1210-1220 | GOR- 161 | 27 |
| 1224.5 | 2996 | 17 | Hd- 24559 | 1220-1229 | GOR- 3   | 27 |
| 1264.5 | 3031 | 20 | Hd- 25726 | 1260-1269 | GOR- 3   | 27 |
| 1274.5 | 2992 | 18 | Hd- 25714 | 1270-1279 | GOR- 3   | 27 |
| 1284.5 | 3037 | 23 | Hd- 25708 | 1280-1289 | GOR- 3   | 27 |
| 1294.5 | 3051 | 21 | Hd- 25706 | 1290-1299 | GOR- 3   | 27 |
| 1304.5 | 2962 | 20 | Hd- 25707 | 1300-1309 | GOR- 3   | 27 |
| 1314.5 | 2970 | 18 | Hd- 25681 | 1310-1319 | GOR- 3   | 27 |
| 1324.5 | 2920 | 18 | Hd- 25688 | 1320-1329 | GOR- 3   | 27 |
| 1325   | 2909 | 28 | Hd- 10439 | 1320-1330 | GOR- 2   | 27 |
| 1334.5 | 2956 | 23 | Hd- 25689 | 1330-1339 | GOR- 3   | 27 |
| 1335   | 2929 | 20 | Hd- 10440 | 1330-1340 | GOR- 2   | 27 |
| 1344.5 | 2937 | 19 | Hd- 25661 | 1340-1349 | GOR- 3   | 27 |
| 1345   | 2962 | 20 | Hd- 10441 | 1340-1350 | GOR- 2   | 27 |
| 1354.5 | 2970 | 19 | Hd- 26965 | 1350-1359 | GOR- 3   | 27 |
| 1364.5 | 2936 | 20 | Hd- 26966 | 1360-1369 | GOR- 3   | 27 |
| 1374.5 | 2955 | 14 | Hd- 27000 | 1370-1379 | GOR- 3   | 27 |
| 1375   | 2955 | 20 | Hd- 10460 | 1370-1380 | GOR- 2   | 27 |
| 1385   | 2946 | 19 | Hd- 18586 | 1380-1390 | GOR- 2   | 27 |
| 1394.5 | 2948 | 15 | Hd- 27001 | 1390-1399 | GOR- 3   | 27 |
| 1395   | 2938 | 23 | Hd- 10822 | 1390-1400 | GOR- 2   | 27 |
| 1404.5 | 2907 | 17 | Hd- 27002 | 1400-1409 | GOR- 3   | 27 |
| 1405   | 2899 | 26 | Hd- 10823 | 1400-1410 | GOR- 2   | 27 |
| 1414.5 | 2912 | 17 | Hd- 27005 | 1410-1419 | GOR- 3   | 27 |
| 1415   | 2918 | 23 | Hd- 18788 | 1410-1420 | GOR- 2   | 27 |
| 1424.5 | 2929 | 15 | Hd- 27003 | 1420-1429 | GOR- 3   | 27 |
| 1434.5 | 2935 | 17 | Hd- 27004 | 1430-1439 | GOR- 3   | 27 |
| 1444.5 | 2871 | 19 | Hd- 27017 | 1440-1449 | GOR- 3   | 27 |
| 1445   | 2942 | 21 | Hd- 10461 | 1440-1450 | GOR- 2   | 27 |
| 1454.5 | 2935 | 16 | Hd- 27018 | 1450-1459 | GOR- 3   | 27 |
| 1464.5 | 2896 | 15 | Hd- 27016 | 1460-1469 | GOR- 3   | 27 |

|        |      |    |           |           |         |    |
|--------|------|----|-----------|-----------|---------|----|
| 1474.5 | 2934 | 14 | Hd- 27020 | 1470-1479 | GOR- 3  | 27 |
| 1484.5 | 2880 | 15 | Hd- 27021 | 1480-1489 | GOR- 3  | 27 |
| 1485   | 2868 | 20 | Hd- 10473 | 1480-1490 | GOR- 2  | 27 |
| 1495   | 2899 | 14 | Hd- 20958 | 1490-1500 | GOR- 2  | 27 |
| 1505   | 2848 | 13 | Hd- 21044 | 1500-1510 | GOR- 2  | 27 |
| 1515   | 2895 | 20 | Hd- 10480 | 1510-1520 | GOR- 2  | 27 |
| 1525   | 2800 | 15 | Hd- 21043 | 1520-1530 | GOR- 2  | 27 |
| 1535   | 2816 | 20 | Hd- 18587 | 1530-1540 | GOR- 2  | 27 |
| 1545   | 2779 | 22 | Hd- 18863 | 1540-1550 | GOR- 2  | 27 |
| 1555   | 2811 | 20 | Hd- 10502 | 1550-1560 | GOR- 2  | 27 |
| 1585   | 2786 | 20 | Hd- 10688 | 1580-1590 | GOR- 2  | 27 |
| 1605   | 2728 | 26 | Hd- 21083 | 1600-1610 | GOR- 2  | 27 |
| 1624.5 | 2746 | 25 | Hd- 21377 | 1620-1629 | GOR- 3  | 27 |
| 1625   | 2777 | 20 | Hd- 10517 | 1620-1630 | GOR- 3  | 27 |
| 1634.5 | 2748 | 18 | Hd- 21378 | 1630-1639 | GOR- 3  | 27 |
| 1635   | 2709 | 13 | Hd- 20980 | 1630-1640 | GOR- 2  | 27 |
| 1644.5 | 2743 | 18 | Hd- 21322 | 1640-1649 | GOR- 3  | 27 |
| 1645   | 2734 | 20 | Hd- 10518 | 1640-1650 | GOR- 3  | 27 |
| 1655   | 2746 | 20 | Hd- 10533 | 1650-1660 | GOR- 3  | 27 |
| 1665   | 2760 | 25 | Hd- 10542 | 1660-1670 | GOR- 3  | 27 |
| 1674.5 | 2730 | 16 | Hd- 24696 | 1670-1679 | GOR- 3  | 27 |
| 1675   | 2720 | 20 | Hd- 10687 | 1670-1680 | GOR- 3  | 27 |
| 1684.5 | 2683 | 23 | Hd- 24699 | 1680-1689 | GOR- 3  | 27 |
| 1685   | 2744 | 18 | Hd- 24111 | 1680-1690 | GOR- 3  | 27 |
| 1694.5 | 2712 | 18 | Hd- 24697 | 1690-1699 | GOR- 3  | 27 |
| 1695   | 2662 | 13 | Hd- 24055 | 1690-1700 | GOR- 3  | 27 |
| 1705   | 2640 | 16 | Hd- 24075 | 1700-1710 | GOR- 3  | 27 |
| 1714.5 | 2666 | 18 | Hd- 21374 | 1710-1719 | GOR- 3  | 27 |
| 1715   | 2616 | 12 | Hd- 24054 | 1710-1720 | GOR- 3  | 27 |
| 1724.5 | 2589 | 21 | Hd- 21375 | 1720-1729 | GOR- 3  | 27 |
| 1725   | 2589 | 17 | Hd- 24076 | 1720-1730 | GOR- 3  | 27 |
| 1725   | 2549 | 19 | Hd- 24708 | 1720-1730 | GOR- 83 | 27 |
| 1734.5 | 2610 | 17 | Hd- 21320 | 1730-1739 | GOR- 3  | 27 |
| 1735   | 2543 | 17 | Hd- 24074 | 1730-1740 | GOR- 3  | 27 |
| 1735   | 2608 | 19 | Hd- 24705 | 1730-1740 | GOR- 83 | 27 |
| 1744.5 | 2549 | 21 | Hd- 21321 | 1740-1749 | GOR- 3  | 27 |
| 1745   | 2555 | 17 | Hd- 24077 | 1740-1750 | GOR- 3  | 27 |
| 1745   | 2502 | 36 | Hd- 24707 | 1740-1750 | GOR- 83 | 27 |
| 1754.5 | 2530 | 25 | Hd- 21340 | 1750-1759 | GOR- 3  | 27 |

**Part 2. GrM measurements on the Noceto (NOC) Quercus sp. samples employed in Figure 3A.**

We note that GrM-11275 from NOC is an unexplained outlier (too old) and is not plotted or used.

The NOC-14 RY1160-1164 sample was subsequently re-prepared and re-dated as GrM-17406.

We employ this date.

| <b><sup>14</sup>C B.P.</b> | <b>SD</b> | <b>Lab ID</b> | <b>Rings,<br/>Relative Years</b> | <b>Sample</b> |
|----------------------------|-----------|---------------|----------------------------------|---------------|
| 3380                       | 25        | GrM-17548     | RY995-999                        | NOC-14        |
| 3375                       | 25        | GrM-17645     | RY1000-1004                      | NOC-14        |
| 3320                       | 25        | GrM-11242     | RY1050-1054                      | NOC-12        |
| 3274                       | 15        | GrM-13697     | RY1050-1054                      | NOC-14        |
| 3332                       | 15        | GrM-13749     | RY1060-1064                      | NOC-14        |
| 3360                       | 25        | GrM-11243     | RY1080-1084                      | NOC-12        |
| 3332                       | 15        | GrM-13750     | RY1080-1084                      | NOC-14        |
| 3317                       | 15        | GrM-13751     | RY1100-1104                      | NOC-14        |
| 3227                       | 14        | GrM-11331     | RY1120-1124                      | NOC-12        |
| 3282                       | 15        | GrM-13696     | RY1120-1124                      | NOC-12        |
| 3260                       | 15        | GrM-13752     | RY1120-1124                      | NOC-14        |
| 3255                       | 25        | GrM-17679     | RY1120-1124                      | NOC-14        |
| 3263                       | 15        | GrM-13754     | RY1140-1144                      | NOC-14        |
| 3330                       | 25        | GrM-11275*    | RY1160-1164                      | NOC-12        |
| 3250                       | 25        | GrM-17406     | RY1160-1164                      | NOC-14        |
| 3222                       | 15        | GrM-13755     | RY1180-1184                      | NOC-14        |
| 3160                       | 35        | GrM-17737     | RY1200-1204                      | NOC-14        |

**Part 3.  $^{14}\text{C}$  measurements on the Oymağaç Höyük (OYM) *Pinus brutia* samples employed in Figure 3B.** We note that two of the x2 bleach samples for OYM are marked with an asterisk (\*). These two dates are unexplained outliers (too old) and are not included in the analysis. The dating of these samples was repeated and we use these repeat dates instead.

| $^{14}\text{C}$ B.P. | SD | Lab ID                          | Rings, Relative Years | Sample |
|----------------------|----|---------------------------------|-----------------------|--------|
| 2747                 | 19 | GrM-14314                       | 1011-1015             | OYM-50 |
| 2737                 | 20 | UGAMS-40841 ABA+bleach          | 1016-1019             | OYM-50 |
| 2706                 | 22 | UGAMS-40841 ABA+bleachx2        | 1016-1019             | OYM-50 |
| 2722                 | 20 | UGAMS-40842 ABA+bleach          | 1020-1022             | OYM-50 |
| 2662                 | 20 | UGAMS-40842 ABA+bleach repeat   | 1020-1022             | OYM-50 |
| 2854                 | 23 | UGAMS-40842 ABA+bleachx2*       | 1020-1022             | OYM-50 |
| 2690                 | 20 | UGAMS-40842 ABA+bleachx2 repeat | 1020-1022             | OYM-50 |
| 2763                 | 16 | GrM-14415                       | 1031-1035             | OYM-50 |
| 2710                 | 20 | UGAMS-40843 ABA+bleach          | 1036-1040             | OYM-50 |
| 2675                 | 22 | UGAMS-40843 ABA+bleach repeat   | 1036-1040             | OYM-50 |
| 2818                 | 22 | UGAMS-40843 ABA+bleachx2*       | 1036-1040             | OYM-50 |
| 2721                 | 23 | UGAMS-40843 ABA+bleachx2 repeat | 1036-1040             | OYM-50 |
| 2670                 | 21 | UGAMS-40844 ABA+bleach          | 1041-1045             | OYM-50 |
| 2717                 | 21 | UGAMS-40844 ABA+bleachx2        | 1041-1045             | OYM-50 |
| 2741                 | 20 | UGAMS-40845 ABA+bleach          | 1046-1050             | OYM-50 |
| 2713                 | 22 | UGAMS-40845 ABA+bleachx2        | 1046-1050             | OYM-50 |
| 2785                 | 25 | GrM-14445                       | 1051-1055             | OYM-50 |
| 2699                 | 20 | UGAMS-40846 ABA+bleach          | 1056-1060             | OYM-50 |
| 2748                 | 23 | UGAMS-40846 ABA+bleachx2        | 1056-1060             | OYM-50 |
| 2738                 | 21 | UGAMS-40847 ABA+bleach          | 1066-1070             | OYM-50 |
| 2767                 | 23 | UGAMS-40847 ABA+bleachx2        | 1066-1070             | OYM-50 |
| 2698                 | 21 | UGAMS-39453                     | 1071-1075             | OYM-50 |
| 2722                 | 23 | Tübitak-0172                    | bark                  | OYM-50 |

**Part 4. Some ETH  $^{14}\text{C}$  data on known age Mediterranean wood samples employed in fig. S1.**

| Mid Year CE                     | Calendar Years CE | $^{14}\text{C}$ Age B.P. | SD | ETH Lab ID |
|---------------------------------|-------------------|--------------------------|----|------------|
| <b>Cyprus Pine (CTC-64)</b>     |                   |                          |    |            |
| 1404.5                          | 1400-1409         | 668                      | 20 | ETH-35594  |
| 1414.5                          | 1410-1419         | 619                      | 20 | ETH-35595  |
| 1425.5                          | 1421-1430         | 523                      | 20 | ETH-35596  |
| 1435.5                          | 1431-1440         | 495                      | 20 | ETH-35597  |
| 1445.5                          | 1441-1450         | 449                      | 19 | ETH-35598  |
| 1454.5                          | 1450-1459         | 441                      | 19 | ETH-35599  |
| 1464.5                          | 1460-1469         | 500                      | 19 | ETH-35600  |
| 1474.5                          | 1470-1479         | 399                      | 19 | ETH-35601  |
| 1484.5                          | 1480-1489         | 385                      | 19 | ETH-35602  |
| 1494.5                          | 1490-1499         | 348                      | 19 | ETH-35603  |
|                                 |                   |                          |    |            |
| <b>Turkish Oak (TuO, BEK-6)</b> |                   |                          |    |            |
| 1404.5                          | 1400-1409         | 565                      | 22 | ETH-35604  |
| 1414.5                          | 1410-1419         | 532                      | 22 | ETH-35605  |

|                                   |           |     |    |           |
|-----------------------------------|-----------|-----|----|-----------|
| 1425.5                            | 1421-1430 | 523 | 14 | ETH-35606 |
| 1435.5                            | 1431-1440 | 515 | 23 | ETH-35607 |
| 1445.5                            | 1441-1450 | 481 | 24 | ETH-35608 |
| 1454.5                            | 1450-1459 | 449 | 18 | ETH-35609 |
| 1464.5                            | 1460-1469 | 390 | 20 | ETH-35610 |
| 1474.5                            | 1470-1479 | 432 | 13 | ETH-35611 |
| 1484.5                            | 1480-1489 | 396 | 13 | ETH-35612 |
|                                   |           |     |    |           |
| <b>Turkish Pine (TuP, CAT-15)</b> |           |     |    |           |
| 1404.5                            | 1400-1409 | 550 | 25 | ETH-35584 |
| 1414.5                            | 1410-1419 | 502 | 15 | ETH-35585 |
| 1425.5                            | 1421-1430 | 483 | 24 | ETH-35586 |
| 1435.5                            | 1431-1440 | 500 | 15 | ETH-35587 |
| 1445.5                            | 1441-1450 | 432 | 24 | ETH-35588 |
| 1454.5                            | 1450-1459 | 424 | 20 | ETH-35589 |
| 1464.5                            | 1460-1469 | 364 | 25 | ETH-25590 |
| 1474.5                            | 1470-1479 | 381 | 14 | ETH-35591 |
| 1484.5                            | 1480-1489 | 447 | 22 | ETH-35592 |
| 1494.5                            | 1490-1499 | 368 | 18 | ETH-35593 |

**Part 5. <sup>14</sup>C dates on known-age Swedish Pine samples employed in fig. S5.**

| <b>Calendar Date CE Year or Mid-Point</b> | <b>Years Dated</b> | <b>Laboratory ID</b> | <b><sup>14</sup>C Age Years B.P.</b> | <b>SD</b> | <b>Reference</b> |
|-------------------------------------------|--------------------|----------------------|--------------------------------------|-----------|------------------|
| 1495                                      | 1495               | OxA-17254            | 337                                  | 26        | 47               |
| 1515                                      | 1515               | SUERC-14015          | 330                                  | 25        | 47               |
| 1535                                      | 1535               | GrA-34748            | 315                                  | 30        | 47               |
| 1550                                      | 1550               | GrA-34751            | 250                                  | 30        | 47               |
| 1555                                      | 1555               | OxA-17252            | 271                                  | 26        | 47               |
| 1560                                      | 1560               | SUERC-14027          | 320                                  | 25        | 47               |
| 1570                                      | 1570               | OxA-17252            | 344                                  | 26        | 47               |
| 1575                                      | 1575               | SUERC-14016          | 320                                  | 30        | 47               |
| 1580                                      | 1580               | GrA-34753            | 330                                  | 30        | 47               |
| 1590                                      | 1590               | SUERC-14020          | 375                                  | 25        | 47               |
| 1595                                      | 1595               | GrA-34747            | 335                                  | 30        | 47               |
| 1600                                      | 1600               | OxA-17251            | 366                                  | 26        | 47               |
| 1608                                      | 1608               | GrA-35286            | 295                                  | 30        | 47               |
| 1620                                      | 1620               | SUERC-14026          | 380                                  | 25        | 47               |
| 1630                                      | 1630               | OxA-17250            | 352                                  | 26        | 47               |
| 1640                                      | 1640               | GrA-34754            | 295                                  | 30        | 47               |
| 1650                                      | 1650               | SUERC-14019          | 260                                  | 25        | 47               |
| 1660                                      | 1660               | OxA-17249            | 175                                  | 26        | 47               |

|           |              |          |     |    |         |
|-----------|--------------|----------|-----|----|---------|
| 1425.5    | 1421-1430    | Hd-24680 | 459 | 14 | SILJ 2C |
| 1435.5    | 1431-1440    | Hd-24694 | 445 | 12 | SILJ 2C |
| 1445.5    | 1441-1450    | Hd-24690 | 423 | 13 | SILJ 2C |
| 1455.5    | 1451-1460    | Hd-24679 | 404 | 13 | SILJ 2C |
| 1575.5    | 1571-1580    | Hd-24693 | 315 | 14 | Ulla 1C |
| 1585.5    | 1581-1590    | Hd-24676 | 345 | 9  | Ulla 1C |
| 1595.5    | 1591-1600    | Hd-24642 | 316 | 12 | Ulla 1C |
| 1605.5    | 1601-1610    | Hd-24645 | 322 | 12 | Ulla 1C |
| 1605.5 EW | 1601-1610 EW | Hd-24494 | 341 | 16 | Ulla 1C |
| 1605.5 LW | 1601-1610 LW | Hd-24474 | 328 | 15 | Ulla 1C |
| 1615.5 EW | 1611-1620 EW | Hd-24472 | 324 | 12 | Ulla 1C |
| 1615.5 LW | 1611-1620 LW | Hd-24473 | 342 | 11 | Ulla 1C |
| 1625.5 EW | 1621-1630 EW | Hd-24629 | 335 | 11 | Ulla 1C |
| 1625.5 LW | 1621-1630 LW | Hd-24630 | 310 | 15 | Ulla 1C |
| 1635.5 EW | 1631-1640 EW | Hd-24638 | 284 | 17 | Ulla 1C |
| 1635.5 LW | 1631-1640 LW | Hd-24640 | 283 | 15 | Ulla 1C |
| 1645.5 EW | 1641-1650 EW | Hd-24925 | 318 | 15 | Ulla 1C |
| 1645.5 LW | 1641-1650 LW | Hd-24888 | 298 | 17 | Ulla 1C |
| 1655.5 EW | 1651-1660 EW | Hd-24739 | 219 | 14 | Ulla 1C |
| 1655.5 LW | 1651-1660 LW | Hd-24744 | 215 | 16 | Ulla 1C |
| 1655.5    | 1651-1660    | Hd-24729 | 229 | 12 | Ulla 1C |
| 1675.5    | 1671-1680    | Hd-24647 | 160 | 15 | HUND 1E |
| 1685.5    | 1681-1690    | Hd-24639 | 134 | 10 | HUND 1E |
| 1695.5    | 1691-1700    | Hd-24681 | 135 | 13 | HUND 1E |

**Table S2. The nine offset periods identified in Fig. 2A.** The start and end years cal B.P. and then the start and end years cal BCE for the offset periods are listed. The offset intervals are where  $\geq 95\%$  of years for a  $\geq 20$  consecutive year interval show the Hd GOR  $^{14}\text{C}$  dataset values as older than the contemporary IntCal04 (2) values.

| cal B.P. start | cal B.P. end | cal BCE start | Cal BCE end | Weighted average offset | SD  |
|----------------|--------------|---------------|-------------|-------------------------|-----|
| 3686           | 3656         | 1737          | 1707        | 14.1                    | 3.8 |
| 3621           | 3600         | 1672          | 1651        | 18.2                    | 4.1 |
| 3550           | 3517         | 1601          | 1568        | 21.7                    | 3.5 |
| 3328           | 3243         | 1379          | 1294        | 29.9                    | 2.6 |
| 3215           | 3147         | 1266          | 1198        | 31.1                    | 3.0 |
| 3080           | 3023         | 1131          | 1074        | 19.6                    | 3.1 |
| 3017           | 2941         | 1068          | 992         | 27.4                    | 2.4 |
| 2820           | 2785         | 871           | 836         | 12.8                    | 4.1 |
| 2755           | 2708         | 806           | 759         | 18.6                    | 3.1 |
